# Supplementary material for: Seroprevalence of Chikungunya virus and living conditions in Feira de Santana, Bahia-Brazil
Source: PLoS Negl Trop Dis. 2021 Apr 20;15(4):e0009289. doi: 10.1371/journal.pntd.0009289 (PMC8087031; doi:10.1371/journal.pntd.0009289)
Supplement: S1 Database — (XLS) [file pntd.0009289.s001.xls]

## Sheet: Sheet1
Sentinel Area	sex	LC	IIP	Chik Result
EUCALIPTOS	2	0	2.11	999
PEDRA DO DESCANSO	2	1	1.57	999
SUBAE	2	1	1.68	999
CASEB I	2	0	3.55	999
SUBAE	2	1	1.68	999
DISPENSARIO SANTANA - JARDIM ACÃCIA	2	1	1.39	999
CASEB I	2	0	3.55	999
JUSSARA - FEIRA X	2	3	1.4	999
CAMPO LIMPO	2	2	2.99	999
CASEB II	2	1	3.55	999
PANORAMA - SITIO MATIAS	2	2	1.1	999
CAMPO LIMPO	2	2	2.99	999
RUA NOVA	2	2	1.38	999
HOMERO FIGUEREDO	2	2	2.85	1
PANORAMA - SITIO MATIAS	2	2	1.1	999
IRMA DULCE	1	0	2.42	999
SANTA MONICA II	1	1	1.02	999
CASEB I	1	0	3.55	999
CSU - CIDADE NOVA	1	0	2.64	999
DISPENSARIO SANTANA - JARDIM ACÃCIA	1	1	1.39	999
SANTA MONICA II	1	1	1.02	999
CONCEICAO III	1	2	0.78	999
CAMPO LIMPO	1	2	2.99	999
EUCALIPTOS	2	0	2.11	999
CSU - CIDADE NOVA	2	0	2.64	999
PANORAMA - SITIO MATIAS	2	2	1.1	999
FRANCISCO PINTO	2	1	0.52	999
HOMERO FIGUEREDO	2	2	2.85	999
CSU - CIDADE NOVA	2	0	2.64	999
SOBRADINHO II - MORADA DAS ARVORES	2	1	1.44	999
CAMPO LIMPO	2	2	2.99	999
EUCALIPTOS	2	0	2.11	999
ASA BRANCA	2	3	2.41	999
FRANCISCO PINTO	2	1	0.52	999
PAMPALONA	1	1	1.1	999
FRANCISCO PINTO	1	1	0.52	999
PAMPALONA	1	1	1.1	999
CSU - CIDADE NOVA	1	0	2.64	999
JARDIM CRUZEIRO	1	1	2.89	999
CSU - CIDADE NOVA	1	0	2.64	999
ASA BRANCA	1	3	2.41	999
PEDRA DO DESCANSO	1	1	1.57	999
PAMPALONA	1	1	1.1	999
PARQUE IPE	1	1	1.05	999
SANTA MONICA II	1	1	1.02	999
HOMERO FIGUEREDO	2	2	2.85	999
GEORGE AMERICO	2	3	2.46	999
SUBAE	1	1	1.68	999
FRANCISCO PINTO	1	1	0.52	999
EUCALIPTOS	1	0	2.11	999
TOMBA	2	2	2.19	999
PAMPALONA	2	1	1.1	999
PEDRA DO DESCANSO	2	1	1.57	0
SANTA MONICA II	2	1	1.02	999
CASEB I	2	0	3.55	999
CASEB II	1	1	3.55	999
FEIRA X	1	3	1.4	999
PANORAMA - SITIO MATIAS	1	2	1.1	999
EUCALIPTOS	1	0	2.11	999
SUBAE	1	1	1.68	999
FRANCISCO PINTO	1	1	0.52	0
JARDIM CRUZEIRO	2	1	2.89	999
FEIRA X	1	3	1.4	999
EUCALIPTOS	2	0	2.11	999
CAMPO LIMPO	2	2	2.99	999
CONCEICAO III	2	2	0.78	0
CAMPO LIMPO	1	2	2.99	0
CASEB I	1	0	3.55	0
CASEB I	1	0	3.55	999
SUBAE	1	1	1.68	0
TOMBA	1	2	2.19	0
CSU - CIDADE NOVA	1	0	2.64	999
PANORAMA - SITIO MATIAS	1	2	1.1	999
CSU - CIDADE NOVA	1	0	2.64	999
IRMA DULCE	1	0	2.42	999
CASEB I	1	0	3.55	999
JARDIM CRUZEIRO	1	1	2.89	999
CSU - CIDADE NOVA	1	0	2.64	999
PEDRA DO DESCANSO	1	1	1.57	999
SANTA MONICA II	1	1	1.02	999
PANORAMA - SITIO MATIAS	1	2	1.1	999
SANTA MONICA II	2	1	1.02	999
CAMPO LIMPO	1	2	2.99	999
MANGABEIRA	1	2	4.5	999
SOBRADINHO II - MORADA DAS ARVORES	2	1	1.44	999
JARDIM CRUZEIRO	2	1	2.89	999
PANORAMA - SITIO MATIAS	2	2	1.1	0
PEDRA DO DESCANSO	2	1	1.57	999
FEIRA X	1	3	1.4	999
GEORGE AMERICO	1	3	2.46	999
CSU - CIDADE NOVA	1	0	2.64	999
PANORAMA - SITIO MATIAS	1	2	1.1	999
RUA NOVA	1	2	1.38	999
PAMPALONA	1	1	1.1	999
SERRARIA BRASIL	1	0	3.98	999
SOBRADINHO II - MORADA DAS ARVORES	1	1	1.44	999
SANTA MONICA II	1	1	1.02	999
GEORGE AMERICO	1	3	2.46	999
GEORGE AMERICO	1	3	2.46	999
DISPENSARIO SANTANA - JARDIM ACÃCIA	1	1	1.39	999
MANGABEIRA	1	2	4.5	999
JARDIM CRUZEIRO	1	1	2.89	999
IRMA DULCE	1	0	2.42	999
SUBAE	2	1	1.68	999
CONCEICAO IV - SANTO ANTONIO DOS PRAZERES	2	3	0.53	999
DISPENSARIO SANTANA - JARDIM ACÃCIA	1	1	1.39	999
CSU - CIDADE NOVA	1	0	2.64	999
CSU - CIDADE NOVA	1	0	2.64	999
PARQUE IPE	2	1	1.05	999
QUEIMADINHA	2	2	1.44	999
CSU - CIDADE NOVA	2	0	2.64	999
CAMPO LIMPO	2	2	2.99	999
RUA NOVA	2	2	1.38	999
PARQUE IPE	1	1	1.05	999
CSU - CIDADE NOVA	1	0	2.64	999
CSU - CIDADE NOVA	1	0	2.64	999
CAMPO LIMPO	1	2	2.99	999
SOBRADINHO II - MORADA DAS ARVORES	2	1	1.44	999
RUA NOVA	2	2	1.38	999
PANORAMA - SITIO MATIAS	1	2	1.1	999
EUCALIPTOS	2	0	2.11	999
PAMPALONA	2	1	1.1	999
PARQUE IPE	2	1	1.05	0
SERRARIA BRASIL	1	0	3.98	999
TOMBA	1	2	2.19	999
IRMA DULCE	2	0	2.42	0
SUBAE	2	1	1.68	0
PANORAMA - SITIO MATIAS	2	2	1.1	999
HOMERO FIGUEREDO	2	2	2.85	999
SERRARIA BRASIL	2	0	3.98	999
RUA NOVA	2	2	1.38	0
CAMPO LIMPO	2	2	2.99	999
GEORGE AMERICO	2	3	2.46	999
SANTA MONICA II	2	1	1.02	999
GEORGE AMERICO	1	3	2.46	999
BARAUNAS	2	1	1.22	999
QUEIMADINHA	2	2	1.44	999
GEORGE AMERICO	1	3	2.46	999
MANGABEIRA	1	2	4.5	999
CONCEICAO IV - SANTO ANTONIO DOS PRAZERES	1	3	0.53	999
CASEB I	2	0	3.55	0
PANORAMA - SITIO MATIAS	2	2	1.1	999
SOBRADINHO II - MORADA DAS ARVORES	1	1	1.44	999
GEORGE AMERICO	1	3	2.46	999
TOMBA	2	2	2.19	0
SUBAE	2	1	1.68	999
PEDRA DO DESCANSO	1	1	1.57	999
SANTA MONICA II	1	1	1.02	999
PARQUE IPE	1	1	1.05	999
CASSA - CAPUCHINHOS	1	0	1.73	999
SUBAE	1	1	1.68	999
SANTA MONICA II	2	1	1.02	999
SUBAE	2	1	1.68	999
SUBAE	1	1	1.68	999
GEORGE AMERICO	2	3	2.46	999
EUCALIPTOS	2	0	2.11	999
SOBRADINHO II - MORADA DAS ARVORES	2	1	1.44	999
SUBAE	2	1	1.68	0
JARDIM CRUZEIRO	2	1	2.89	0
CAMPO LIMPO	2	2	2.99	999
SUBAE	2	1	1.68	999
SUBAE	1	1	1.68	999
CONCEICAO IV - SANTO ANTONIO DOS PRAZERES	1	3	0.53	999
FRANCISCO PINTO	1	1	0.52	999
RUA NOVA	1	2	1.38	0
FRANCISCO PINTO	1	1	0.52	999
TOMBA	2	2	2.19	999
FEIRA X	1	3	1.4	999
RUA NOVA	2	2	1.38	999
EUCALIPTOS	1	0	2.11	999
CASEB I	1	0	3.55	999
SUBAE	2	1	1.68	999
PARQUE IPE	1	1	1.05	999
SANTA MONICA II	2	1	1.02	999
SANTA MONICA II	2	1	1.02	999
FRANCISCO PINTO	1	1	0.52	999
CASEB II	1	1	3.55	999
EUCALIPTOS	1	0	2.11	999
JARDIM CRUZEIRO	1	1	2.89	999
QUEIMADINHA	1	2	1.44	999
PANORAMA - SITIO MATIAS	1	2	1.1	999
RUA NOVA	1	2	1.38	999
SOBRADINHO II - MORADA DAS ARVORES	1	1	1.44	999
ASA BRANCA	1	3	2.41	999
QUEIMADINHA	1	2	1.44	999
CAMPO LIMPO	1	2	2.99	999
PANORAMA - SITIO MATIAS	1	2	1.1	999
CONCEICAO III	2	2	0.78	0
SERRARIA BRASIL	1	0	3.98	0
CASEB II	1	1	3.55	999
CASEB I	1	0	3.55	999
CAMPO LIMPO	2	2	2.99	999
CSU - CIDADE NOVA	2	0	2.64	999
SOBRADINHO II - MORADA DAS ARVORES	2	1	1.44	999
SUBAE	2	1	1.68	999
SOBRADINHO II - MORADA DAS ARVORES	1	1	1.44	999
PEDRA DO DESCANSO	2	1	1.57	999
SERRARIA BRASIL	1	0	3.98	999
PARQUE IPE	1	1	1.05	999
PAMPALONA	2	1	1.1	999
PAMPALONA	2	1	1.1	999
EUCALIPTOS	2	0	2.11	999
RUA NOVA	2	2	1.38	1
BARAUNAS	2	1	1.22	999
TOMBA	2	2	2.19	999
SERRARIA BRASIL	2	0	3.98	0
PANORAMA - SITIO MATIAS	2	2	1.1	0
PAMPALONA	2	1	1.1	999
QUEIMADINHA	2	2	1.44	999
DISPENSARIO SANTANA - JARDIM ACÃCIA	2	1	1.39	999
PANORAMA - SITIO MATIAS	2	2	1.1	999
EUCALIPTOS	2	0	2.11	999
QUEIMADINHA	2	2	1.44	999
ASA BRANCA	2	3	2.41	999
SANTA MONICA II	2	1	1.02	999
SUBAE	2	1	1.68	999
BARAUNAS	2	1	1.22	999
PAMPALONA	2	1	1.1	999
CONCEICAO III	2	2	0.78	0
MANGABEIRA	2	2	4.5	999
QUEIMADINHA	2	2	1.44	999
PARQUE IPE	2	1	1.05	999
QUEIMADINHA	2	2	1.44	999
IRMA DULCE	2	0	2.42	999
HOMERO FIGUEREDO	2	2	2.85	3
PANORAMA - SITIO MATIAS	2	2	1.1	0
FRANCISCO PINTO	2	1	0.52	999
SOBRADINHO II - MORADA DAS ARVORES	2	1	1.44	999
CASSA - CAPUCHINHOS	2	0	1.73	999
ASA BRANCA	2	3	2.41	999
CONCEICAO IV - SANTO ANTONIO DOS PRAZERES	2	3	0.53	1
SERRARIA BRASIL	2	0	3.98	999
CASEB II	1	1	3.55	999
CASSA - CAPUCHINHOS	2	0	1.73	999
EUCALIPTOS	2	0	2.11	999
PEDRA DO DESCANSO	2	1	1.57	999
CSU - CIDADE NOVA	2	0	2.64	999
PARQUE IPE	2	1	1.05	999
SANTA MONICA II	2	1	1.02	999
PANORAMA - SITIO MATIAS	2	2	1.1	999
GEORGE AMERICO	1	3	2.46	999
SOBRADINHO II - MORADA DAS ARVORES	2	1	1.44	999
CONCEICAO IV - SANTO ANTONIO DOS PRAZERES	2	3	0.53	999
CONCEICAO IV - SANTO ANTONIO DOS PRAZERES	2	3	0.53	999
SANTA MONICA II	2	1	1.02	999
CAMPO LIMPO	2	2	2.99	999
DISPENSARIO SANTANA - JARDIM ACÃCIA	2	1	1.39	999
PEDRA DO DESCANSO	2	1	1.57	1
CONCEICAO III	2	2	0.78	999
QUEIMADINHA	2	2	1.44	999
CSU - CIDADE NOVA	2	0	2.64	999
CSU - CIDADE NOVA	2	0	2.64	999
CASSA - CAPUCHINHOS	2	0	1.73	999
EUCALIPTOS	2	0	2.11	999
JARDIM CRUZEIRO	2	1	2.89	999
CAMPO LIMPO	1	2	2.99	999
CAMPO LIMPO	1	2	2.99	0
FEIRA X	1	3	1.4	999
FRANCISCO PINTO	1	1	0.52	999
PEDRA DO DESCANSO	1	1	1.57	999
CSU - CIDADE NOVA	1	0	2.64	999
SOBRADINHO II - MORADA DAS ARVORES	1	1	1.44	999
SANTA MONICA II	1	1	1.02	999
TOMBA	2	2	2.19	999
CASEB II	1	1	3.55	999
CAMPO LIMPO	2	2	2.99	999
EUCALIPTOS	1	0	2.11	999
IRMA DULCE	1	0	2.42	999
BARAUNAS	1	1	1.22	999
BARAUNAS	1	1	1.22	999
CONCEICAO IV - SANTO ANTONIO DOS PRAZERES	1	3	0.53	3
CONCEICAO III	1	2	0.78	999
PANORAMA - SITIO MATIAS	1	2	1.1	999
CONCEICAO III	1	2	0.78	999
CAMPO LIMPO	1	2	2.99	999
CAMPO LIMPO	1	2	2.99	999
MANGABEIRA	1	2	4.5	999
SANTA MONICA II	1	1	1.02	999
PANORAMA - SITIO MATIAS	1	2	1.1	999
DISPENSARIO SANTANA - JARDIM ACÃCIA	2	1	1.39	999
FRANCISCO PINTO	2	1	0.52	999
JARDIM CRUZEIRO	2	1	2.89	999
CASEB I	2	0	3.55	0
HOMERO FIGUEREDO	2	2	2.85	999
PAMPALONA	2	1	1.1	999
CASEB I	2	0	3.55	0
IRMA DULCE	2	0	2.42	999
MANGABEIRA	2	2	4.5	999
BARAUNAS	2	1	1.22	999
CONCEICAO III	2	2	0.78	999
PANORAMA - SITIO MATIAS	2	2	1.1	999
PAMPALONA	2	1	1.1	999
CASEB I	2	0	3.55	999
SOBRADINHO II - MORADA DAS ARVORES	2	1	1.44	999
PANORAMA - SITIO MATIAS	2	2	1.1	999
CASEB II	2	1	3.55	0
JUSSARA - FEIRA X	2	3	1.4	999
QUEIMADINHA	2	2	1.44	0
SERRARIA BRASIL	2	0	3.98	0
CSU - CIDADE NOVA	2	0	2.64	999
CONCEICAO IV - SANTO ANTONIO DOS PRAZERES	2	3	0.53	0
FRANCISCO PINTO	1	1	0.52	999
PANORAMA - SITIO MATIAS	1	2	1.1	999
FRANCISCO PINTO	1	1	0.52	0
IRMA DULCE	1	0	2.42	999
SUBAE	1	1	1.68	999
EUCALIPTOS	1	0	2.11	999
SOBRADINHO II - MORADA DAS ARVORES	1	1	1.44	999
PAMPALONA	1	1	1.1	999
GEORGE AMERICO	1	3	2.46	999
CSU - CIDADE NOVA	1	0	2.64	999
PARQUE IPE	1	1	1.05	999
FEIRA X	2	3	1.4	0
PEDRA DO DESCANSO	2	1	1.57	999
QUEIMADINHA	2	2	1.44	999
PAMPALONA	2	1	1.1	999
JARDIM CRUZEIRO	1	1	2.89	999
CSU - CIDADE NOVA	1	0	2.64	999
DISPENSARIO SANTANA - JARDIM ACÃCIA	1	1	1.39	999
JARDIM CRUZEIRO	1	1	2.89	999
PARQUE IPE	1	1	1.05	999
PANORAMA - SITIO MATIAS	2	2	1.1	999
RUA NOVA	1	2	1.38	999
HOMERO FIGUEREDO	1	2	2.85	999
CSU - CIDADE NOVA	1	0	2.64	999
SANTA MONICA II	1	1	1.02	999
CASEB I	1	0	3.55	999
PARQUE IPE	1	1	1.05	0
FRANCISCO PINTO	1	1	0.52	999
FRANCISCO PINTO	2	1	0.52	999
PAMPALONA	2	1	1.1	999
IRMA DULCE	1	0	2.42	999
CSU - CIDADE NOVA	2	0	2.64	999
CSU - CIDADE NOVA	2	0	2.64	999
SERRARIA BRASIL	1	0	3.98	1
GEORGE AMERICO	2	3	2.46	999
HOMERO FIGUEREDO	2	2	2.85	999
CASEB II	1	1	3.55	999
PEDRA DO DESCANSO	2	1	1.57	999
PEDRA DO DESCANSO	2	1	1.57	999
CASEB II	2	1	3.55	999
CASEB I	1	0	3.55	999
MANGABEIRA	2	2	4.5	999
HOMERO FIGUEREDO	2	2	2.85	999
SANTA MONICA II	2	1	1.02	999
CASEB I	2	0	3.55	999
SERRARIA BRASIL	2	0	3.98	0
CONCEICAO III	2	2	0.78	999
SANTA MONICA II	2	1	1.02	999
PARQUE IPE	2	1	1.05	999
PEDRA DO DESCANSO	2	1	1.57	999
BARAUNAS	1	1	1.22	999
SANTA MONICA II	1	1	1.02	0
EUCALIPTOS	1	0	2.11	999
GEORGE AMERICO	1	3	2.46	999
PAMPALONA	1	1	1.1	999
PARQUE IPE	1	1	1.05	999
SERRARIA BRASIL	1	0	3.98	999
PANORAMA - SITIO MATIAS	1	2	1.1	999
IRMA DULCE	1	0	2.42	999
CASEB I	1	0	3.55	0
BARAUNAS	1	1	1.22	999
HOMERO FIGUEREDO	1	2	2.85	999
CSU - CIDADE NOVA	1	0	2.64	999
EUCALIPTOS	2	0	2.11	999
SOBRADINHO II - MORADA DAS ARVORES	2	1	1.44	999
SUBAE	1	1	1.68	999
BARAUNAS	2	1	1.22	999
DISPENSARIO SANTANA - JARDIM ACÃCIA	2	1	1.39	999
JARDIM CRUZEIRO	1	1	2.89	999
ASA BRANCA	2	3	2.41	999
HOMERO FIGUEREDO	1	2	2.85	999
SOBRADINHO II - MORADA DAS ARVORES	2	1	1.44	999
PARQUE IPE	2	1	1.05	999
CSU - CIDADE NOVA	2	0	2.64	999
TOMBA	2	2	2.19	999
CSU - CIDADE NOVA	2	0	2.64	999
CONCEICAO IV - SANTO ANTONIO DOS PRAZERES	2	3	0.53	999
RUA NOVA	2	2	1.38	999
PARQUE IPE	2	1	1.05	999
JARDIM CRUZEIRO	2	1	2.89	999
CSU - CIDADE NOVA	2	0	2.64	999
CAMPO LIMPO	2	2	2.99	999
PANORAMA - SITIO MATIAS	2	2	1.1	999
FRANCISCO PINTO	2	1	0.52	999
RUA NOVA	2	2	1.38	1
TOMBA	2	2	2.19	1
PANORAMA - SITIO MATIAS	2	2	1.1	0
CASSA - CAPUCHINHOS	2	0	1.73	0
PAMPALONA	2	1	1.1	999
RUA NOVA	2	2	1.38	999
CASSA - CAPUCHINHOS	2	0	1.73	999
SUBAE	2	1	1.68	0
JUSSARA - FEIRA X	2	3	1.4	0
QUEIMADINHA	1	2	1.44	999
CONCEICAO III	1	2	0.78	999
QUEIMADINHA	1	2	1.44	999
SUBAE	1	1	1.68	999
PANORAMA - SITIO MATIAS	1	2	1.1	999
CASSA - CAPUCHINHOS	1	0	1.73	999
IRMA DULCE	1	0	2.42	999
IRMA DULCE	1	0	2.42	999
PARQUE IPE	1	1	1.05	999
IRMA DULCE	1	0	2.42	999
CASSA - CAPUCHINHOS	1	0	1.73	999
JARDIM CRUZEIRO	1	1	2.89	0
PEDRA DO DESCANSO	1	1	1.57	1
PARQUE IPE	1	1	1.05	999
CONCEICAO IV - SANTO ANTONIO DOS PRAZERES	1	3	0.53	999
CSU - CIDADE NOVA	1	0	2.64	999
CONCEICAO III	1	2	0.78	999
SANTA MONICA II	1	1	1.02	999
PARQUE IPE	1	1	1.05	999
PARQUE IPE	1	1	1.05	999
PARQUE IPE	2	1	1.05	999
FEIRA X	2	3	1.4	999
EUCALIPTOS	2	0	2.11	0
QUEIMADINHA	2	2	1.44	999
SANTA MONICA II	2	1	1.02	999
CASSA - CAPUCHINHOS	2	0	1.73	999
SUBAE	2	1	1.68	999
SERRARIA BRASIL	2	0	3.98	999
PARQUE IPE	2	1	1.05	999
CSU - CIDADE NOVA	2	0	2.64	999
CONCEICAO III	2	2	0.78	999
FRANCISCO PINTO	2	1	0.52	999
PANORAMA - SITIO MATIAS	2	2	1.1	1
JARDIM CRUZEIRO	2	1	2.89	999
RUA NOVA	2	2	1.38	1
JARDIM CRUZEIRO	2	1	2.89	999
QUEIMADINHA	2	2	1.44	999
GEORGE AMERICO	2	3	2.46	999
PARQUE IPE	2	1	1.05	999
PANORAMA - SITIO MATIAS	2	2	1.1	0
PEDRA DO DESCANSO	2	1	1.57	0
CASSA - CAPUCHINHOS	2	0	1.73	999
CASSA - CAPUCHINHOS	2	0	1.73	999
JARDIM CRUZEIRO	2	1	2.89	999
MANGABEIRA	2	2	4.5	999
PARQUE IPE	2	1	1.05	999
CONCEICAO III	2	2	0.78	999
GEORGE AMERICO	2	3	2.46	999
BARAUNAS	1	1	1.22	999
CSU - CIDADE NOVA	1	0	2.64	999
FRANCISCO PINTO	1	1	0.52	999
CSU - CIDADE NOVA	1	0	2.64	999
SOBRADINHO II - MORADA DAS ARVORES	2	1	1.44	999
DISPENSARIO SANTANA - JARDIM ACÃCIA	2	1	1.39	0
SOBRADINHO II - MORADA DAS ARVORES	2	1	1.44	999
RUA NOVA	1	2	1.38	999
CAMPO LIMPO	1	2	2.99	999
CAMPO LIMPO	1	2	2.99	999
SANTA MONICA II	1	1	1.02	999
SUBAE	1	1	1.68	999
SERRARIA BRASIL	1	0	3.98	999
EUCALIPTOS	1	0	2.11	999
QUEIMADINHA	1	2	1.44	999
PANORAMA - SITIO MATIAS	1	2	1.1	999
SERRARIA BRASIL	1	0	3.98	999
SERRARIA BRASIL	1	0	3.98	999
IRMA DULCE	1	0	2.42	999
GEORGE AMERICO	1	3	2.46	999
IRMA DULCE	2	0	2.42	999
EUCALIPTOS	1	0	2.11	0
GEORGE AMERICO	1	3	2.46	999
FEIRA X	1	3	1.4	999
CSU - CIDADE NOVA	1	0	2.64	999
JARDIM CRUZEIRO	1	1	2.89	999
CSU - CIDADE NOVA	1	0	2.64	999
SANTA MONICA II	1	1	1.02	999
GEORGE AMERICO	1	3	2.46	999
FRANCISCO PINTO	2	1	0.52	999
TOMBA	2	2	2.19	999
CASSA - CAPUCHINHOS	2	0	1.73	999
CASSA - CAPUCHINHOS	2	0	1.73	999
FEIRA X	2	3	1.4	999
CASSA - CAPUCHINHOS	2	0	1.73	999
SANTA MONICA II	2	1	1.02	999
PAMPALONA	2	1	1.1	999
CAMPO LIMPO	1	2	2.99	999
DISPENSARIO SANTANA - JARDIM ACÃCIA	2	1	1.39	999
PAMPALONA	2	1	1.1	999
CSU - CIDADE NOVA	2	0	2.64	999
DISPENSARIO SANTANA - JARDIM ACÃCIA	2	1	1.39	0
IRMA DULCE	2	0	2.42	0
CSU - CIDADE NOVA	2	0	2.64	999
PEDRA DO DESCANSO	2	1	1.57	1
CONCEICAO IV - SANTO ANTONIO DOS PRAZERES	2	3	0.53	999
PARQUE IPE	2	1	1.05	0
SOBRADINHO II - MORADA DAS ARVORES	2	1	1.44	0
SOBRADINHO II - MORADA DAS ARVORES	2	1	1.44	999
PANORAMA - SITIO MATIAS	1	2	1.1	999
QUEIMADINHA	1	2	1.44	999
SERRARIA BRASIL	2	0	3.98	999
SUBAE	1	1	1.68	0
DISPENSARIO SANTANA - JARDIM ACÃCIA	2	1	1.39	999
GEORGE AMERICO	1	3	2.46	999
CSU - CIDADE NOVA	1	0	2.64	999
SUBAE	2	1	1.68	999
ASA BRANCA	2	3	2.41	0
TOMBA	2	2	2.19	999
HOMERO FIGUEREDO	2	2	2.85	999
CSU - CIDADE NOVA	2	0	2.64	999
PANORAMA - SITIO MATIAS	2	2	1.1	999
EUCALIPTOS	2	0	2.11	999
HOMERO FIGUEREDO	2	2	2.85	999
CSU - CIDADE NOVA	1	0	2.64	999
TOMBA	1	2	2.19	999
CSU - CIDADE NOVA	1	0	2.64	999
SERRARIA BRASIL	2	0	3.98	999
FRANCISCO PINTO	1	1	0.52	999
EUCALIPTOS	1	0	2.11	999
CAMPO LIMPO	1	2	2.99	999
RUA NOVA	1	2	1.38	999
SERRARIA BRASIL	1	0	3.98	999
PAMPALONA	1	1	1.1	999
GEORGE AMERICO	2	3	2.46	999
SANTA MONICA II	1	1	1.02	0
PAMPALONA	1	1	1.1	999
CASSA - CAPUCHINHOS	2	0	1.73	0
PAMPALONA	2	1	1.1	1
PANORAMA - SITIO MATIAS	2	2	1.1	999
SERRARIA BRASIL	2	0	3.98	999
CAMPO LIMPO	2	2	2.99	999
PARQUE IPE	2	1	1.05	999
SOBRADINHO II - MORADA DAS ARVORES	2	1	1.44	999
IRMA DULCE	2	0	2.42	999
QUEIMADINHA	2	2	1.44	999
SERRARIA BRASIL	2	0	3.98	999
CASSA - CAPUCHINHOS	2	0	1.73	999
SOBRADINHO II - MORADA DAS ARVORES	2	1	1.44	999
PEDRA DO DESCANSO	2	1	1.57	999
FRANCISCO PINTO	2	1	0.52	999
FEIRA X	2	3	1.4	999
IRMA DULCE	2	0	2.42	999
CSU - CIDADE NOVA	2	0	2.64	999
JARDIM CRUZEIRO	1	1	2.89	999
QUEIMADINHA	1	2	1.44	999
QUEIMADINHA	1	2	1.44	999
CASEB II	1	1	3.55	999
CONCEICAO III	1	2	0.78	999
SERRARIA BRASIL	1	0	3.98	999
CASSA - CAPUCHINHOS	1	0	1.73	999
CAMPO LIMPO	1	2	2.99	999
CSU - CIDADE NOVA	1	0	2.64	999
CAMPO LIMPO	2	2	2.99	0
FRANCISCO PINTO	1	1	0.52	0
FRANCISCO PINTO	1	1	0.52	999
CASEB I	1	0	3.55	999
CASEB I	1	0	3.55	999
FRANCISCO PINTO	1	1	0.52	999
IRMA DULCE	1	0	2.42	999
CAMPO LIMPO	1	2	2.99	999
JUSSARA - FEIRA X	1	3	1.4	999
ASA BRANCA	1	3	2.41	999
JARDIM CRUZEIRO	1	1	2.89	999
MANGABEIRA	1	2	4.5	999
SOBRADINHO II - MORADA DAS ARVORES	1	1	1.44	999
CASSA - CAPUCHINHOS	1	0	1.73	0
MANGABEIRA	1	2	4.5	999
SANTA MONICA II	1	1	1.02	1
PARQUE IPE	1	1	1.05	999
JUSSARA - FEIRA X	1	3	1.4	999
HOMERO FIGUEREDO	1	2	2.85	999
PANORAMA - SITIO MATIAS	1	2	1.1	999
SUBAE	1	1	1.68	999
QUEIMADINHA	2	2	1.44	999
JARDIM CRUZEIRO	1	1	2.89	999
HOMERO FIGUEREDO	2	2	2.85	999
CASSA - CAPUCHINHOS	2	0	1.73	0
PAMPALONA	2	1	1.1	1
CONCEICAO III	2	2	0.78	999
PANORAMA - SITIO MATIAS	2	2	1.1	999
BARAUNAS	2	1	1.22	999
MANGABEIRA	2	2	4.5	999
FRANCISCO PINTO	2	1	0.52	999
SANTA MONICA II	2	1	1.02	999
FEIRA X	2	3	1.4	999
PANORAMA - SITIO MATIAS	2	2	1.1	999
CONCEICAO IV - SANTO ANTONIO DOS PRAZERES	1	3	0.53	999
CAMPO LIMPO	1	2	2.99	999
SANTA MONICA II	1	1	1.02	0
SUBAE	1	1	1.68	999
GEORGE AMERICO	1	3	2.46	999
CAMPO LIMPO	1	2	2.99	999
SUBAE	1	1	1.68	999
CASSA - CAPUCHINHOS	1	0	1.73	999
QUEIMADINHA	1	2	1.44	999
QUEIMADINHA	1	2	1.44	999
JARDIM CRUZEIRO	1	1	2.89	999
CASSA - CAPUCHINHOS	1	0	1.73	999
TOMBA	1	2	2.19	999
IRMA DULCE	1	0	2.42	999
JARDIM CRUZEIRO	1	1	2.89	999
MANGABEIRA	1	2	4.5	999
JARDIM CRUZEIRO	1	1	2.89	999
CONCEICAO III	1	2	0.78	999
JARDIM CRUZEIRO	1	1	2.89	999
PAMPALONA	1	1	1.1	999
JARDIM CRUZEIRO	1	1	2.89	999
CASSA - CAPUCHINHOS	2	0	1.73	999
BARAUNAS	1	1	1.22	0
QUEIMADINHA	2	2	1.44	999
PAMPALONA	2	1	1.1	999
QUEIMADINHA	2	2	1.44	999
CSU - CIDADE NOVA	1	0	2.64	1
HOMERO FIGUEREDO	2	2	2.85	999
GEORGE AMERICO	2	3	2.46	999
IRMA DULCE	2	0	2.42	999
ASA BRANCA	2	3	2.41	999
IRMA DULCE	2	0	2.42	999
SANTA MONICA II	2	1	1.02	999
CAMPO LIMPO	1	2	2.99	999
IRMA DULCE	1	0	2.42	999
CASEB I	1	0	3.55	999
RUA NOVA	1	2	1.38	999
CASEB II	1	1	3.55	999
CAMPO LIMPO	1	2	2.99	999
HOMERO FIGUEREDO	1	2	2.85	999
CONCEICAO III	1	2	0.78	999
EUCALIPTOS	1	0	2.11	999
PAMPALONA	1	1	1.1	999
PARQUE IPE	1	1	1.05	999
GEORGE AMERICO	1	3	2.46	999
FRANCISCO PINTO	1	1	0.52	999
HOMERO FIGUEREDO	1	2	2.85	999
JARDIM CRUZEIRO	1	1	2.89	999
JARDIM CRUZEIRO	2	1	2.89	999
JARDIM CRUZEIRO	1	1	2.89	999
PANORAMA - SITIO MATIAS	1	2	1.1	999
CONCEICAO III	1	2	0.78	999
CASEB I	1	0	3.55	999
HOMERO FIGUEREDO	1	2	2.85	999
CASEB I	1	0	3.55	999
CASEB I	1	0	3.55	999
GEORGE AMERICO	1	3	2.46	999
CSU - CIDADE NOVA	2	0	2.64	999
CAMPO LIMPO	1	2	2.99	999
SOBRADINHO II - MORADA DAS ARVORES	2	1	1.44	999
HOMERO FIGUEREDO	2	2	2.85	999
DISPENSARIO SANTANA - JARDIM ACÃCIA	2	1	1.39	999
SOBRADINHO II - MORADA DAS ARVORES	2	1	1.44	999
SERRARIA BRASIL	2	0	3.98	999
TOMBA	2	2	2.19	999
PAMPALONA	2	1	1.1	999
PARQUE IPE	2	1	1.05	999
CONCEICAO III	2	2	0.78	999
JARDIM CRUZEIRO	2	1	2.89	999
JARDIM CRUZEIRO	2	1	2.89	999
CONCEICAO III	2	2	0.78	999
CONCEICAO IV - SANTO ANTONIO DOS PRAZERES	2	3	0.53	999
DISPENSARIO SANTANA - JARDIM ACÃCIA	2	1	1.39	999
ASA BRANCA	2	3	2.41	999
TOMBA	2	2	2.19	999
MANGABEIRA	2	2	4.5	999
QUEIMADINHA	2	2	1.44	999
GEORGE AMERICO	2	3	2.46	999
ASA BRANCA	2	3	2.41	999
QUEIMADINHA	2	2	1.44	999
QUEIMADINHA	2	2	1.44	999
CASEB II	2	1	3.55	0
PANORAMA - SITIO MATIAS	2	2	1.1	999
QUEIMADINHA	2	2	1.44	999
PAMPALONA	2	1	1.1	999
EUCALIPTOS	2	0	2.11	999
JARDIM CRUZEIRO	2	1	2.89	0
GEORGE AMERICO	2	3	2.46	999
QUEIMADINHA	2	2	1.44	999
PAMPALONA	2	1	1.1	999
GEORGE AMERICO	2	3	2.46	999
HOMERO FIGUEREDO	2	2	2.85	999
JUSSARA - FEIRA X	2	3	1.4	999
CAMPO LIMPO	2	2	2.99	999
FRANCISCO PINTO	2	1	0.52	999
SERRARIA BRASIL	2	0	3.98	999
SOBRADINHO II - MORADA DAS ARVORES	2	1	1.44	999
EUCALIPTOS	2	0	2.11	999
PAMPALONA	2	1	1.1	999
FRANCISCO PINTO	2	1	0.52	999
SANTA MONICA II	2	1	1.02	999
ASA BRANCA	2	3	2.41	999
FEIRA X	2	3	1.4	999
ASA BRANCA	2	3	2.41	999
PEDRA DO DESCANSO	2	1	1.57	999
PARQUE IPE	2	1	1.05	999
CASEB I	2	0	3.55	999
DISPENSARIO SANTANA - JARDIM ACÃCIA	2	1	1.39	999
PARQUE IPE	2	1	1.05	999
SANTA MONICA II	2	1	1.02	999
SERRARIA BRASIL	2	0	3.98	999
PANORAMA - SITIO MATIAS	2	2	1.1	999
SUBAE	2	1	1.68	999
SUBAE	2	1	1.68	999
ASA BRANCA	2	3	2.41	999
PARQUE IPE	2	1	1.05	999
QUEIMADINHA	2	2	1.44	0
FEIRA X	2	3	1.4	999
QUEIMADINHA	2	2	1.44	999
CSU - CIDADE NOVA	2	0	2.64	999
MANGABEIRA	2	2	4.5	999
MANGABEIRA	2	2	4.5	999
JARDIM CRUZEIRO	2	1	2.89	999
TOMBA	2	2	2.19	999
CONCEICAO III	2	2	0.78	999
CASEB II	2	1	3.55	999
TOMBA	2	2	2.19	0
IRMA DULCE	2	0	2.42	999
RUA NOVA	2	2	1.38	1
IRMA DULCE	2	0	2.42	999
RUA NOVA	2	2	1.38	999
CAMPO LIMPO	2	2	2.99	0
SANTA MONICA II	2	1	1.02	999
HOMERO FIGUEREDO	2	2	2.85	999
SERRARIA BRASIL	2	0	3.98	0
HOMERO FIGUEREDO	2	2	2.85	999
CAMPO LIMPO	2	2	2.99	999
PEDRA DO DESCANSO	2	1	1.57	999
SUBAE	2	1	1.68	999
CSU - CIDADE NOVA	2	0	2.64	999
BARAUNAS	2	1	1.22	0
CASEB I	2	0	3.55	999
SERRARIA BRASIL	2	0	3.98	999
SUBAE	2	1	1.68	999
SANTA MONICA II	2	1	1.02	999
CASSA - CAPUCHINHOS	2	0	1.73	999
PARQUE IPE	2	1	1.05	999
CASSA - CAPUCHINHOS	2	0	1.73	999
CSU - CIDADE NOVA	2	0	2.64	999
CAMPO LIMPO	1	2	2.99	999
PEDRA DO DESCANSO	2	1	1.57	999
SOBRADINHO II - MORADA DAS ARVORES	2	1	1.44	999
TOMBA	1	2	2.19	999
IRMA DULCE	1	0	2.42	999
IRMA DULCE	1	0	2.42	999
SANTA MONICA II	1	1	1.02	999
JARDIM CRUZEIRO	1	1	2.89	0
SERRARIA BRASIL	1	0	3.98	999
QUEIMADINHA	1	2	1.44	999
SOBRADINHO II - MORADA DAS ARVORES	1	1	1.44	999
SUBAE	1	1	1.68	999
PANORAMA - SITIO MATIAS	1	2	1.1	999
SANTA MONICA II	1	1	1.02	999
CSU - CIDADE NOVA	1	0	2.64	999
CASSA - CAPUCHINHOS	1	0	1.73	999
ASA BRANCA	1	3	2.41	999
PANORAMA - SITIO MATIAS	1	2	1.1	999
QUEIMADINHA	1	2	1.44	999
CONCEICAO IV - SANTO ANTONIO DOS PRAZERES	1	3	0.53	999
JUSSARA - FEIRA X	1	3	1.4	999
FRANCISCO PINTO	1	1	0.52	999
GEORGE AMERICO	1	3	2.46	999
SUBAE	1	1	1.68	999
DISPENSARIO SANTANA - JARDIM ACÃCIA	1	1	1.39	999
CASEB II	1	1	3.55	999
RUA NOVA	1	2	1.38	999
ASA BRANCA	1	3	2.41	999
CASSA - CAPUCHINHOS	1	0	1.73	999
PAMPALONA	1	1	1.1	999
SUBAE	2	1	1.68	999
PAMPALONA	2	1	1.1	999
GEORGE AMERICO	2	3	2.46	999
FEIRA X	2	3	1.4	999
PEDRA DO DESCANSO	2	1	1.57	999
CASSA - CAPUCHINHOS	2	0	1.73	999
FEIRA X	2	3	1.4	999
SOBRADINHO II - MORADA DAS ARVORES	2	1	1.44	999
PARQUE IPE	2	1	1.05	999
MANGABEIRA	2	2	4.5	999
SOBRADINHO II - MORADA DAS ARVORES	2	1	1.44	999
SOBRADINHO II - MORADA DAS ARVORES	2	1	1.44	999
PAMPALONA	2	1	1.1	999
GEORGE AMERICO	1	3	2.46	999
SOBRADINHO II - MORADA DAS ARVORES	1	1	1.44	999
IRMA DULCE	1	0	2.42	0
CASSA - CAPUCHINHOS	1	0	1.73	999
PAMPALONA	1	1	1.1	999
EUCALIPTOS	1	0	2.11	0
FEIRA X	1	3	1.4	999
PAMPALONA	1	1	1.1	999
SERRARIA BRASIL	2	0	3.98	999
CASEB I	2	0	3.55	999
PANORAMA - SITIO MATIAS	1	2	1.1	999
IRMA DULCE	1	0	2.42	999
PAMPALONA	1	1	1.1	1
QUEIMADINHA	1	2	1.44	999
CASSA - CAPUCHINHOS	1	0	1.73	999
CASEB II	1	1	3.55	999
SOBRADINHO II - MORADA DAS ARVORES	1	1	1.44	999
SUBAE	1	1	1.68	999
SUBAE	2	1	1.68	999
PARQUE IPE	2	1	1.05	999
PARQUE IPE	1	1	1.05	999
PARQUE IPE	1	1	1.05	999
SERRARIA BRASIL	1	0	3.98	999
CASEB II	2	1	3.55	999
PANORAMA - SITIO MATIAS	2	2	1.1	0
SANTA MONICA II	2	1	1.02	999
SOBRADINHO II - MORADA DAS ARVORES	1	1	1.44	999
SOBRADINHO II - MORADA DAS ARVORES	1	1	1.44	999
FEIRA X	1	3	1.4	999
CSU - CIDADE NOVA	2	0	2.64	999
SANTA MONICA II	1	1	1.02	999
PAMPALONA	1	1	1.1	999
CONCEICAO III	2	2	0.78	999
CASEB II	1	1	3.55	0
HOMERO FIGUEREDO	2	2	2.85	999
TOMBA	2	2	2.19	0
CSU - CIDADE NOVA	2	0	2.64	999
SOBRADINHO II - MORADA DAS ARVORES	2	1	1.44	999
CONCEICAO IV - SANTO ANTONIO DOS PRAZERES	2	3	0.53	0
PANORAMA - SITIO MATIAS	2	2	1.1	999
CAMPO LIMPO	2	2	2.99	999
PARQUE IPE	2	1	1.05	999
CASEB II	2	1	3.55	999
SOBRADINHO II - MORADA DAS ARVORES	2	1	1.44	999
SOBRADINHO II - MORADA DAS ARVORES	1	1	1.44	999
CONCEICAO IV - SANTO ANTONIO DOS PRAZERES	2	3	0.53	0
PEDRA DO DESCANSO	2	1	1.57	999
SOBRADINHO II - MORADA DAS ARVORES	1	1	1.44	999
FRANCISCO PINTO	2	1	0.52	999
JARDIM CRUZEIRO	2	1	2.89	0
SERRARIA BRASIL	2	0	3.98	999
SOBRADINHO II - MORADA DAS ARVORES	2	1	1.44	999
PAMPALONA	1	1	1.1	999
CASEB I	1	0	3.55	999
RUA NOVA	1	2	1.38	999
SOBRADINHO II - MORADA DAS ARVORES	1	1	1.44	999
SUBAE	1	1	1.68	999
PARQUE IPE	1	1	1.05	999
JARDIM CRUZEIRO	1	1	2.89	999
EUCALIPTOS	2	0	2.11	1
QUEIMADINHA	2	2	1.44	999
FEIRA X	2	3	1.4	999
PANORAMA - SITIO MATIAS	2	2	1.1	999
CONCEICAO III	2	2	0.78	999
IRMA DULCE	2	0	2.42	999
IRMA DULCE	2	0	2.42	999
JARDIM CRUZEIRO	2	1	2.89	999
GEORGE AMERICO	2	3	2.46	999
HOMERO FIGUEREDO	2	2	2.85	999
SUBAE	2	1	1.68	999
CAMPO LIMPO	2	2	2.99	999
CSU - CIDADE NOVA	2	0	2.64	999
BARAUNAS	2	1	1.22	999
SUBAE	2	1	1.68	999
CSU - CIDADE NOVA	2	0	2.64	999
QUEIMADINHA	2	2	1.44	999
FRANCISCO PINTO	2	1	0.52	999
CONCEICAO IV - SANTO ANTONIO DOS PRAZERES	2	3	0.53	999
SANTA MONICA II	2	1	1.02	999
PEDRA DO DESCANSO	2	1	1.57	0
FRANCISCO PINTO	2	1	0.52	3
CAMPO LIMPO	2	2	2.99	999
SANTA MONICA II	2	1	1.02	999
PARQUE IPE	2	1	1.05	999
CAMPO LIMPO	2	2	2.99	999
EUCALIPTOS	2	0	2.11	999
QUEIMADINHA	2	2	1.44	999
FEIRA X	2	3	1.4	999
MANGABEIRA	2	2	4.5	999
PARQUE IPE	2	1	1.05	999
RUA NOVA	2	2	1.38	1
CASEB I	2	0	3.55	999
PARQUE IPE	2	1	1.05	999
CASSA - CAPUCHINHOS	2	0	1.73	0
CONCEICAO III	2	2	0.78	999
ASA BRANCA	2	3	2.41	999
SOBRADINHO II - MORADA DAS ARVORES	2	1	1.44	999
CONCEICAO III	2	2	0.78	999
CASEB II	2	1	3.55	999
SOBRADINHO II - MORADA DAS ARVORES	2	1	1.44	999
PARQUE IPE	2	1	1.05	999
CONCEICAO IV - SANTO ANTONIO DOS PRAZERES	2	3	0.53	0
GEORGE AMERICO	2	3	2.46	999
CASSA - CAPUCHINHOS	2	0	1.73	999
QUEIMADINHA	2	2	1.44	999
JARDIM CRUZEIRO	1	1	2.89	999
MANGABEIRA	2	2	4.5	999
PANORAMA - SITIO MATIAS	2	2	1.1	0
PANORAMA - SITIO MATIAS	2	2	1.1	0
IRMA DULCE	1	0	2.42	999
FRANCISCO PINTO	2	1	0.52	0
ASA BRANCA	2	3	2.41	999
CONCEICAO III	2	2	0.78	999
CSU - CIDADE NOVA	2	0	2.64	999
ASA BRANCA	2	3	2.41	999
PARQUE IPE	2	1	1.05	999
PANORAMA - SITIO MATIAS	1	2	1.1	999
BARAUNAS	2	1	1.22	999
CONCEICAO IV - SANTO ANTONIO DOS PRAZERES	2	3	0.53	999
CSU - CIDADE NOVA	1	0	2.64	999
CSU - CIDADE NOVA	1	0	2.64	999
CSU - CIDADE NOVA	2	0	2.64	999
SANTA MONICA II	1	1	1.02	999
SANTA MONICA II	1	1	1.02	999
SANTA MONICA II	2	1	1.02	999
EUCALIPTOS	2	0	2.11	999
PEDRA DO DESCANSO	2	1	1.57	999
SOBRADINHO II - MORADA DAS ARVORES	2	1	1.44	999
MANGABEIRA	2	2	4.5	999
PARQUE IPE	1	1	1.05	999
PAMPALONA	1	1	1.1	0
PAMPALONA	1	1	1.1	999
PEDRA DO DESCANSO	1	1	1.57	999
FEIRA X	1	3	1.4	999
PANORAMA - SITIO MATIAS	1	2	1.1	999
SUBAE	1	1	1.68	999
MANGABEIRA	1	2	4.5	999
SANTA MONICA II	1	1	1.02	999
MANGABEIRA	2	2	4.5	999
SOBRADINHO II - MORADA DAS ARVORES	2	1	1.44	999
FRANCISCO PINTO	2	1	0.52	999
SUBAE	2	1	1.68	999
PAMPALONA	2	1	1.1	1
GEORGE AMERICO	2	3	2.46	999
JARDIM CRUZEIRO	2	1	2.89	999
PARQUE IPE	2	1	1.05	999
CAMPO LIMPO	2	2	2.99	999
JARDIM CRUZEIRO	2	1	2.89	999
SERRARIA BRASIL	2	0	3.98	999
GEORGE AMERICO	2	3	2.46	999
DISPENSARIO SANTANA - JARDIM ACÃCIA	2	1	1.39	0
PANORAMA - SITIO MATIAS	2	2	1.1	0
TOMBA	2	2	2.19	999
EUCALIPTOS	2	0	2.11	999
JARDIM CRUZEIRO	2	1	2.89	999
PAMPALONA	2	1	1.1	999
SUBAE	2	1	1.68	999
RUA NOVA	2	2	1.38	999
IRMA DULCE	2	0	2.42	999
MANGABEIRA	2	2	4.5	999
SERRARIA BRASIL	2	0	3.98	999
SOBRADINHO II - MORADA DAS ARVORES	2	1	1.44	999
GEORGE AMERICO	2	3	2.46	999
SERRARIA BRASIL	2	0	3.98	999
ASA BRANCA	2	3	2.41	999
PAMPALONA	2	1	1.1	999
CAMPO LIMPO	2	2	2.99	999
FRANCISCO PINTO	2	1	0.52	0
SANTA MONICA II	2	1	1.02	999
CONCEICAO IV - SANTO ANTONIO DOS PRAZERES	2	3	0.53	999
ASA BRANCA	2	3	2.41	999
ASA BRANCA	2	3	2.41	999
MANGABEIRA	2	2	4.5	999
BARAUNAS	2	1	1.22	999
PEDRA DO DESCANSO	2	1	1.57	999
IRMA DULCE	2	0	2.42	999
JUSSARA - FEIRA X	2	3	1.4	999
CSU - CIDADE NOVA	2	0	2.64	999
QUEIMADINHA	2	2	1.44	999
SUBAE	2	1	1.68	0
MANGABEIRA	2	2	4.5	999
JUSSARA - FEIRA X	2	3	1.4	999
CAMPO LIMPO	2	2	2.99	999
CONCEICAO IV - SANTO ANTONIO DOS PRAZERES	2	3	0.53	999
BARAUNAS	2	1	1.22	999
JARDIM CRUZEIRO	2	1	2.89	999
SERRARIA BRASIL	1	0	3.98	999
TOMBA	2	2	2.19	0
SERRARIA BRASIL	2	0	3.98	999
PAMPALONA	2	1	1.1	999
ASA BRANCA	2	3	2.41	999
IRMA DULCE	2	0	2.42	3
CONCEICAO III	2	2	0.78	999
PAMPALONA	2	1	1.1	999
PAMPALONA	2	1	1.1	999
IRMA DULCE	2	0	2.42	999
SERRARIA BRASIL	2	0	3.98	999
CSU - CIDADE NOVA	2	0	2.64	999
HOMERO FIGUEREDO	2	2	2.85	999
PAMPALONA	2	1	1.1	999
SANTA MONICA II	2	1	1.02	999
CONCEICAO III	2	2	0.78	999
TOMBA	2	2	2.19	999
FEIRA X	2	3	1.4	999
QUEIMADINHA	2	2	1.44	999
PAMPALONA	2	1	1.1	999
CASEB I	2	0	3.55	999
ASA BRANCA	2	3	2.41	999
MANGABEIRA	2	2	4.5	999
PAMPALONA	2	1	1.1	0
HOMERO FIGUEREDO	2	2	2.85	999
EUCALIPTOS	2	0	2.11	0
PARQUE IPE	2	1	1.05	999
FRANCISCO PINTO	2	1	0.52	999
PAMPALONA	2	1	1.1	1
GEORGE AMERICO	2	3	2.46	999
QUEIMADINHA	2	2	1.44	999
EUCALIPTOS	2	0	2.11	999
SERRARIA BRASIL	2	0	3.98	999
CSU - CIDADE NOVA	2	0	2.64	999
BARAUNAS	2	1	1.22	999
SUBAE	2	1	1.68	0
IRMA DULCE	2	0	2.42	999
PAMPALONA	2	1	1.1	999
ASA BRANCA	2	3	2.41	999
ASA BRANCA	2	3	2.41	999
DISPENSARIO SANTANA - JARDIM ACÃCIA	2	1	1.39	999
SANTA MONICA II	2	1	1.02	999
PANORAMA - SITIO MATIAS	2	2	1.1	999
HOMERO FIGUEREDO	2	2	2.85	999
SANTA MONICA II	1	1	1.02	999
PANORAMA - SITIO MATIAS	2	2	1.1	999
CONCEICAO IV - SANTO ANTONIO DOS PRAZERES	2	3	0.53	999
PAMPALONA	2	1	1.1	999
CASSA - CAPUCHINHOS	2	0	1.73	999
CASSA - CAPUCHINHOS	2	0	1.73	999
IRMA DULCE	2	0	2.42	999
SOBRADINHO II - MORADA DAS ARVORES	2	1	1.44	999
PEDRA DO DESCANSO	2	1	1.57	999
CASSA - CAPUCHINHOS	2	0	1.73	999
EUCALIPTOS	2	0	2.11	999
PEDRA DO DESCANSO	2	1	1.57	999
GEORGE AMERICO	2	3	2.46	999
EUCALIPTOS	2	0	2.11	0
PANORAMA - SITIO MATIAS	2	2	1.1	999
PANORAMA - SITIO MATIAS	2	2	1.1	999
SERRARIA BRASIL	2	0	3.98	999
HOMERO FIGUEREDO	2	2	2.85	999
SUBAE	2	1	1.68	0
CAMPO LIMPO	2	2	2.99	999
QUEIMADINHA	2	2	1.44	999
TOMBA	2	2	2.19	999
CASEB I	2	0	3.55	999
PAMPALONA	2	1	1.1	999
SUBAE	2	1	1.68	999
SOBRADINHO II - MORADA DAS ARVORES	2	1	1.44	999
CASEB I	2	0	3.55	999
CAMPO LIMPO	2	2	2.99	999
CONCEICAO III	2	2	0.78	999
RUA NOVA	2	2	1.38	999
RUA NOVA	2	2	1.38	1
MANGABEIRA	2	2	4.5	999
PANORAMA - SITIO MATIAS	2	2	1.1	999
CONCEICAO III	2	2	0.78	0
TOMBA	2	2	2.19	999
QUEIMADINHA	2	2	1.44	999
FEIRA X	2	3	1.4	999
PAMPALONA	2	1	1.1	999
CSU - CIDADE NOVA	2	0	2.64	999
CAMPO LIMPO	2	2	2.99	0
PANORAMA - SITIO MATIAS	2	2	1.1	999
QUEIMADINHA	2	2	1.44	999
IRMA DULCE	2	0	2.42	999
CSU - CIDADE NOVA	2	0	2.64	999
JUSSARA - FEIRA X	2	3	1.4	999
FEIRA X	2	3	1.4	999
CASEB II	2	1	3.55	999
CASEB II	2	1	3.55	0
TOMBA	2	2	2.19	999
FRANCISCO PINTO	2	1	0.52	999
CONCEICAO III	2	2	0.78	999
CASEB I	2	0	3.55	999
HOMERO FIGUEREDO	2	2	2.85	999
SUBAE	2	1	1.68	999
JARDIM CRUZEIRO	2	1	2.89	999
SERRARIA BRASIL	2	0	3.98	999
ASA BRANCA	2	3	2.41	999
SUBAE	2	1	1.68	999
CONCEICAO III	2	2	0.78	999
DISPENSARIO SANTANA - JARDIM ACÃCIA	2	1	1.39	999
QUEIMADINHA	2	2	1.44	999
SOBRADINHO II - MORADA DAS ARVORES	2	1	1.44	999
HOMERO FIGUEREDO	2	2	2.85	999
CSU - CIDADE NOVA	2	0	2.64	999
PANORAMA - SITIO MATIAS	2	2	1.1	999
CONCEICAO IV - SANTO ANTONIO DOS PRAZERES	2	3	0.53	999
JARDIM CRUZEIRO	2	1	2.89	999
SUBAE	2	1	1.68	999
MANGABEIRA	2	2	4.5	999
PAMPALONA	2	1	1.1	1
RUA NOVA	2	2	1.38	999
SOBRADINHO II - MORADA DAS ARVORES	2	1	1.44	999
CASSA - CAPUCHINHOS	2	0	1.73	999
JARDIM CRUZEIRO	2	1	2.89	999
TOMBA	2	2	2.19	0
SOBRADINHO II - MORADA DAS ARVORES	2	1	1.44	999
SUBAE	2	1	1.68	999
QUEIMADINHA	2	2	1.44	999
QUEIMADINHA	2	2	1.44	999
FRANCISCO PINTO	2	1	0.52	999
IRMA DULCE	2	0	2.42	999
SOBRADINHO II - MORADA DAS ARVORES	2	1	1.44	999
SOBRADINHO II - MORADA DAS ARVORES	2	1	1.44	999
FEIRA X	2	3	1.4	999
FRANCISCO PINTO	2	1	0.52	0
PAMPALONA	2	1	1.1	999
IRMA DULCE	2	0	2.42	999
PAMPALONA	2	1	1.1	999
CAMPO LIMPO	2	2	2.99	999
CSU - CIDADE NOVA	2	0	2.64	0
FEIRA X	2	3	1.4	999
GEORGE AMERICO	2	3	2.46	999
QUEIMADINHA	2	2	1.44	999
PARQUE IPE	2	1	1.05	999
EUCALIPTOS	2	0	2.11	999
BARAUNAS	2	1	1.22	999
HOMERO FIGUEREDO	2	2	2.85	999
CASEB I	2	0	3.55	999
HOMERO FIGUEREDO	2	2	2.85	999
CONCEICAO III	2	2	0.78	999
QUEIMADINHA	1	2	1.44	0
CASSA - CAPUCHINHOS	2	0	1.73	999
SOBRADINHO II - MORADA DAS ARVORES	2	1	1.44	999
CSU - CIDADE NOVA	2	0	2.64	999
GEORGE AMERICO	2	3	2.46	999
BARAUNAS	2	1	1.22	999
CASEB II	2	1	3.55	999
FRANCISCO PINTO	2	1	0.52	999
CSU - CIDADE NOVA	2	0	2.64	999
PANORAMA - SITIO MATIAS	2	2	1.1	999
SUBAE	2	1	1.68	999
PEDRA DO DESCANSO	2	1	1.57	0
SANTA MONICA II	2	1	1.02	999
SOBRADINHO II - MORADA DAS ARVORES	2	1	1.44	999
RUA NOVA	2	2	1.38	999
RUA NOVA	2	2	1.38	999
ASA BRANCA	2	3	2.41	999
ASA BRANCA	2	3	2.41	999
EUCALIPTOS	2	0	2.11	999
CASEB II	2	1	3.55	999
PANORAMA - SITIO MATIAS	2	2	1.1	999
JARDIM CRUZEIRO	2	1	2.89	999
QUEIMADINHA	2	2	1.44	999
FRANCISCO PINTO	2	1	0.52	999
TOMBA	2	2	2.19	999
GEORGE AMERICO	2	3	2.46	999
PAMPALONA	2	1	1.1	999
JARDIM CRUZEIRO	2	1	2.89	999
PARQUE IPE	2	1	1.05	999
CSU - CIDADE NOVA	2	0	2.64	999
ASA BRANCA	2	3	2.41	999
PAMPALONA	2	1	1.1	999
BARAUNAS	2	1	1.22	999
CASSA - CAPUCHINHOS	2	0	1.73	999
PARQUE IPE	2	1	1.05	999
PARQUE IPE	2	1	1.05	999
CASSA - CAPUCHINHOS	2	0	1.73	999
RUA NOVA	2	2	1.38	999
JARDIM CRUZEIRO	2	1	2.89	999
SANTA MONICA II	2	1	1.02	999
RUA NOVA	2	2	1.38	0
EUCALIPTOS	2	0	2.11	999
SANTA MONICA II	2	1	1.02	0
SUBAE	2	1	1.68	999
SOBRADINHO II - MORADA DAS ARVORES	2	1	1.44	999
FRANCISCO PINTO	2	1	0.52	999
CAMPO LIMPO	2	2	2.99	999
CAMPO LIMPO	2	2	2.99	999
SERRARIA BRASIL	2	0	3.98	999
JUSSARA - FEIRA X	2	3	1.4	3
BARAUNAS	2	1	1.22	999
PAMPALONA	2	1	1.1	999
QUEIMADINHA	2	2	1.44	999
SERRARIA BRASIL	2	0	3.98	999
SOBRADINHO II - MORADA DAS ARVORES	2	1	1.44	999
IRMA DULCE	2	0	2.42	999
ASA BRANCA	2	3	2.41	999
CASSA - CAPUCHINHOS	2	0	1.73	999
CASEB I	2	0	3.55	999
FRANCISCO PINTO	1	1	0.52	999
SUBAE	2	1	1.68	0
SANTA MONICA II	2	1	1.02	999
JARDIM CRUZEIRO	2	1	2.89	999
MANGABEIRA	2	2	4.5	999
PAMPALONA	2	1	1.1	999
TOMBA	2	2	2.19	999
SOBRADINHO II - MORADA DAS ARVORES	2	1	1.44	999
IRMA DULCE	2	0	2.42	999
FRANCISCO PINTO	2	1	0.52	999
CASSA - CAPUCHINHOS	2	0	1.73	999
EUCALIPTOS	2	0	2.11	0
SANTA MONICA II	2	1	1.02	0
IRMA DULCE	1	0	2.42	999
CSU - CIDADE NOVA	2	0	2.64	999
CASEB II	2	1	3.55	999
CAMPO LIMPO	2	2	2.99	999
CSU - CIDADE NOVA	2	0	2.64	999
QUEIMADINHA	2	2	1.44	999
QUEIMADINHA	2	2	1.44	999
HOMERO FIGUEREDO	2	2	2.85	999
DISPENSARIO SANTANA - JARDIM ACÃCIA	2	1	1.39	999
PANORAMA - SITIO MATIAS	2	2	1.1	999
DISPENSARIO SANTANA - JARDIM ACÃCIA	2	1	1.39	0
CASSA - CAPUCHINHOS	2	0	1.73	999
PEDRA DO DESCANSO	2	1	1.57	999
SUBAE	2	1	1.68	999
GEORGE AMERICO	2	3	2.46	999
CASSA - CAPUCHINHOS	2	0	1.73	999
SOBRADINHO II - MORADA DAS ARVORES	2	1	1.44	999
CASSA - CAPUCHINHOS	2	0	1.73	999
PAMPALONA	2	1	1.1	999
IRMA DULCE	2	0	2.42	999
TOMBA	2	2	2.19	999
SERRARIA BRASIL	2	0	3.98	999
CSU - CIDADE NOVA	2	0	2.64	999
SERRARIA BRASIL	2	0	3.98	999
SERRARIA BRASIL	2	0	3.98	999
SUBAE	2	1	1.68	999
PAMPALONA	2	1	1.1	1
FRANCISCO PINTO	2	1	0.52	999
CONCEICAO III	2	2	0.78	999
CASSA - CAPUCHINHOS	2	0	1.73	999
CSU - CIDADE NOVA	2	0	2.64	999
PARQUE IPE	2	1	1.05	999
PAMPALONA	2	1	1.1	999
QUEIMADINHA	2	2	1.44	999
PAMPALONA	2	1	1.1	999
CSU - CIDADE NOVA	2	0	2.64	999
PAMPALONA	2	1	1.1	999
ASA BRANCA	2	3	2.41	0
GEORGE AMERICO	2	3	2.46	999
SOBRADINHO II - MORADA DAS ARVORES	2	1	1.44	999
SANTA MONICA II	2	1	1.02	999
CASEB I	2	0	3.55	999
SERRARIA BRASIL	2	0	3.98	999
CASEB I	2	0	3.55	999
HOMERO FIGUEREDO	2	2	2.85	0
PANORAMA - SITIO MATIAS	2	2	1.1	999
FEIRA X	2	3	1.4	999
QUEIMADINHA	2	2	1.44	999
BARAUNAS	2	1	1.22	999
TOMBA	2	2	2.19	999
CASSA - CAPUCHINHOS	2	0	1.73	999
FRANCISCO PINTO	2	1	0.52	999
CAMPO LIMPO	2	2	2.99	999
PANORAMA - SITIO MATIAS	2	2	1.1	999
QUEIMADINHA	2	2	1.44	999
ASA BRANCA	2	3	2.41	999
PANORAMA - SITIO MATIAS	2	2	1.1	999
JARDIM CRUZEIRO	2	1	2.89	999
SUBAE	1	1	1.68	999
IRMA DULCE	2	0	2.42	999
SOBRADINHO II - MORADA DAS ARVORES	2	1	1.44	999
QUEIMADINHA	2	2	1.44	999
SUBAE	2	1	1.68	999
CONCEICAO IV - SANTO ANTONIO DOS PRAZERES	2	3	0.53	999
JARDIM CRUZEIRO	2	1	2.89	999
SERRARIA BRASIL	2	0	3.98	0
SANTA MONICA II	2	1	1.02	999
PAMPALONA	2	1	1.1	999
HOMERO FIGUEREDO	2	2	2.85	1
SOBRADINHO II - MORADA DAS ARVORES	2	1	1.44	999
HOMERO FIGUEREDO	2	2	2.85	999
IRMA DULCE	2	0	2.42	999
FEIRA X	2	3	1.4	999
SUBAE	2	1	1.68	999
MANGABEIRA	2	2	4.5	999
SOBRADINHO II - MORADA DAS ARVORES	2	1	1.44	999
RUA NOVA	2	2	1.38	999
SUBAE	2	1	1.68	999
SUBAE	2	1	1.68	999
PAMPALONA	2	1	1.1	999
RUA NOVA	2	2	1.38	999
QUEIMADINHA	2	2	1.44	0
QUEIMADINHA	2	2	1.44	999
SANTA MONICA II	2	1	1.02	0
PARQUE IPE	2	1	1.05	999
JARDIM CRUZEIRO	2	1	2.89	999
PEDRA DO DESCANSO	2	1	1.57	999
DISPENSARIO SANTANA - JARDIM ACÃCIA	2	1	1.39	0
JARDIM CRUZEIRO	2	1	2.89	0
TOMBA	2	2	2.19	999
GEORGE AMERICO	2	3	2.46	999
SANTA MONICA II	2	1	1.02	999
CASSA - CAPUCHINHOS	2	0	1.73	999
RUA NOVA	2	2	1.38	999
SOBRADINHO II - MORADA DAS ARVORES	2	1	1.44	1
HOMERO FIGUEREDO	2	2	2.85	999
SERRARIA BRASIL	2	0	3.98	999
PANORAMA - SITIO MATIAS	2	2	1.1	999
FEIRA X	2	3	1.4	1
HOMERO FIGUEREDO	2	2	2.85	999
MANGABEIRA	2	2	4.5	999
IRMA DULCE	2	0	2.42	999
QUEIMADINHA	2	2	1.44	999
MANGABEIRA	2	2	4.5	999
BARAUNAS	2	1	1.22	0
CONCEICAO IV - SANTO ANTONIO DOS PRAZERES	2	3	0.53	999
PEDRA DO DESCANSO	2	1	1.57	0
CSU - CIDADE NOVA	2	0	2.64	0
CASEB I	2	0	3.55	999
PAMPALONA	2	1	1.1	999
SERRARIA BRASIL	2	0	3.98	999
SOBRADINHO II - MORADA DAS ARVORES	2	1	1.44	999
MANGABEIRA	2	2	4.5	999
PEDRA DO DESCANSO	2	1	1.57	999
EUCALIPTOS	2	0	2.11	999
FEIRA X	2	3	1.4	999
CSU - CIDADE NOVA	2	0	2.64	999
DISPENSARIO SANTANA - JARDIM ACÃCIA	2	1	1.39	999
HOMERO FIGUEREDO	2	2	2.85	999
SOBRADINHO II - MORADA DAS ARVORES	2	1	1.44	999
CAMPO LIMPO	2	2	2.99	999
IRMA DULCE	2	0	2.42	999
SOBRADINHO II - MORADA DAS ARVORES	2	1	1.44	999
CAMPO LIMPO	2	2	2.99	999
CSU - CIDADE NOVA	2	0	2.64	999
QUEIMADINHA	2	2	1.44	999
TOMBA	2	2	2.19	999
BARAUNAS	2	1	1.22	999
SOBRADINHO II - MORADA DAS ARVORES	2	1	1.44	999
IRMA DULCE	2	0	2.42	999
CASEB II	2	1	3.55	0
SUBAE	2	1	1.68	999
JARDIM CRUZEIRO	2	1	2.89	999
JARDIM CRUZEIRO	2	1	2.89	999
ASA BRANCA	2	3	2.41	999
SUBAE	2	1	1.68	999
GEORGE AMERICO	2	3	2.46	999
EUCALIPTOS	2	0	2.11	999
RUA NOVA	2	2	1.38	1
CONCEICAO III	2	2	0.78	999
SOBRADINHO II - MORADA DAS ARVORES	2	1	1.44	999
CONCEICAO IV - SANTO ANTONIO DOS PRAZERES	2	3	0.53	0
PAMPALONA	2	1	1.1	999
SOBRADINHO II - MORADA DAS ARVORES	2	1	1.44	999
QUEIMADINHA	2	2	1.44	999
CAMPO LIMPO	2	2	2.99	999
JARDIM CRUZEIRO	1	1	2.89	999
PANORAMA - SITIO MATIAS	1	2	1.1	999
CONCEICAO III	2	2	0.78	999
PAMPALONA	2	1	1.1	999
TOMBA	2	2	2.19	0
GEORGE AMERICO	2	3	2.46	999
SOBRADINHO II - MORADA DAS ARVORES	2	1	1.44	999
EUCALIPTOS	2	0	2.11	0
CSU - CIDADE NOVA	2	0	2.64	999
PEDRA DO DESCANSO	2	1	1.57	999
CAMPO LIMPO	2	2	2.99	999
JUSSARA - FEIRA X	2	3	1.4	0
PAMPALONA	2	1	1.1	999
RUA NOVA	2	2	1.38	999
SOBRADINHO II - MORADA DAS ARVORES	2	1	1.44	999
JARDIM CRUZEIRO	2	1	2.89	999
PANORAMA - SITIO MATIAS	2	2	1.1	999
PEDRA DO DESCANSO	2	1	1.57	999
BARAUNAS	2	1	1.22	999
SERRARIA BRASIL	2	0	3.98	999
CSU - CIDADE NOVA	2	0	2.64	999
CSU - CIDADE NOVA	2	0	2.64	999
PARQUE IPE	2	1	1.05	999
CASEB II	2	1	3.55	999
SANTA MONICA II	2	1	1.02	999
CSU - CIDADE NOVA	1	0	2.64	999
SANTA MONICA II	1	1	1.02	999
HOMERO FIGUEREDO	1	2	2.85	999
JARDIM CRUZEIRO	1	1	2.89	0
SOBRADINHO II - MORADA DAS ARVORES	1	1	1.44	999
RUA NOVA	2	2	1.38	999
PANORAMA - SITIO MATIAS	2	2	1.1	999
SERRARIA BRASIL	2	0	3.98	999
QUEIMADINHA	2	2	1.44	999
JARDIM CRUZEIRO	2	1	2.89	999
QUEIMADINHA	2	2	1.44	999
PANORAMA - SITIO MATIAS	1	2	1.1	0
PANORAMA - SITIO MATIAS	1	2	1.1	999
PANORAMA - SITIO MATIAS	1	2	1.1	999
CASEB I	1	0	3.55	999
SUBAE	1	1	1.68	999
FRANCISCO PINTO	1	1	0.52	999
PARQUE IPE	1	1	1.05	999
PANORAMA - SITIO MATIAS	1	2	1.1	999
FRANCISCO PINTO	1	1	0.52	999
CASSA - CAPUCHINHOS	1	0	1.73	999
QUEIMADINHA	1	2	1.44	999
HOMERO FIGUEREDO	1	2	2.85	999
PAMPALONA	1	1	1.1	999
CONCEICAO IV - SANTO ANTONIO DOS PRAZERES	1	3	0.53	999
SUBAE	1	1	1.68	999
PAMPALONA	1	1	1.1	999
GEORGE AMERICO	1	3	2.46	999
GEORGE AMERICO	1	3	2.46	999
QUEIMADINHA	1	2	1.44	999
IRMA DULCE	1	0	2.42	999
SUBAE	1	1	1.68	999
PEDRA DO DESCANSO	1	1	1.57	999
CSU - CIDADE NOVA	1	0	2.64	999
CAMPO LIMPO	1	2	2.99	999
CAMPO LIMPO	1	2	2.99	999
CASEB I	1	0	3.55	999
SOBRADINHO II - MORADA DAS ARVORES	1	1	1.44	999
CONCEICAO III	1	2	0.78	999
SOBRADINHO II - MORADA DAS ARVORES	1	1	1.44	999
CASEB I	1	0	3.55	999
SOBRADINHO II - MORADA DAS ARVORES	1	1	1.44	999
SUBAE	1	1	1.68	999
HOMERO FIGUEREDO	1	2	2.85	999
PEDRA DO DESCANSO	1	1	1.57	999
SANTA MONICA II	1	1	1.02	999
SUBAE	1	1	1.68	0
JARDIM CRUZEIRO	1	1	2.89	999
SERRARIA BRASIL	1	0	3.98	0
SERRARIA BRASIL	1	0	3.98	999
IRMA DULCE	1	0	2.42	999
DISPENSARIO SANTANA - JARDIM ACÃCIA	1	1	1.39	999
FEIRA X	1	3	1.4	999
JARDIM CRUZEIRO	1	1	2.89	999
PEDRA DO DESCANSO	2	1	1.57	999
SANTA MONICA II	1	1	1.02	999
FRANCISCO PINTO	1	1	0.52	999
CASEB I	1	0	3.55	999
CSU - CIDADE NOVA	1	0	2.64	999
TOMBA	1	2	2.19	0
GEORGE AMERICO	1	3	2.46	999
SOBRADINHO II - MORADA DAS ARVORES	1	1	1.44	999
JARDIM CRUZEIRO	1	1	2.89	999
PANORAMA - SITIO MATIAS	1	2	1.1	999
RUA NOVA	1	2	1.38	1
CAMPO LIMPO	1	2	2.99	999
CAMPO LIMPO	1	2	2.99	999
FEIRA X	1	3	1.4	999
EUCALIPTOS	1	0	2.11	0
ASA BRANCA	1	3	2.41	999
PEDRA DO DESCANSO	1	1	1.57	999
GEORGE AMERICO	1	3	2.46	999
SUBAE	1	1	1.68	999
PAMPALONA	1	1	1.1	999
SUBAE	1	1	1.68	999
PANORAMA - SITIO MATIAS	1	2	1.1	999
HOMERO FIGUEREDO	1	2	2.85	999
SOBRADINHO II - MORADA DAS ARVORES	2	1	1.44	999
CSU - CIDADE NOVA	2	0	2.64	999
HOMERO FIGUEREDO	2	2	2.85	999
SANTA MONICA II	2	1	1.02	999
QUEIMADINHA	2	2	1.44	999
QUEIMADINHA	2	2	1.44	999
SERRARIA BRASIL	2	0	3.98	999
SANTA MONICA II	2	1	1.02	999
SOBRADINHO II - MORADA DAS ARVORES	2	1	1.44	999
FEIRA X	2	3	1.4	999
EUCALIPTOS	2	0	2.11	999
PARQUE IPE	1	1	1.05	999
HOMERO FIGUEREDO	1	2	2.85	999
PARQUE IPE	1	1	1.05	999
JARDIM CRUZEIRO	1	1	2.89	999
QUEIMADINHA	1	2	1.44	999
CASSA - CAPUCHINHOS	1	0	1.73	999
CASEB II	1	1	3.55	999
HOMERO FIGUEREDO	2	2	2.85	999
RUA NOVA	2	2	1.38	0
HOMERO FIGUEREDO	2	2	2.85	999
PEDRA DO DESCANSO	2	1	1.57	0
CAMPO LIMPO	2	2	2.99	999
JARDIM CRUZEIRO	2	1	2.89	999
PANORAMA - SITIO MATIAS	1	2	1.1	999
SANTA MONICA II	1	1	1.02	999
SERRARIA BRASIL	1	0	3.98	999
SERRARIA BRASIL	1	0	3.98	999
PAMPALONA	2	1	1.1	999
PAMPALONA	2	1	1.1	999
GEORGE AMERICO	2	3	2.46	999
HOMERO FIGUEREDO	2	2	2.85	999
DISPENSARIO SANTANA - JARDIM ACÃCIA	2	1	1.39	0
SUBAE	2	1	1.68	0
QUEIMADINHA	2	2	1.44	0
SANTA MONICA II	2	1	1.02	999
PANORAMA - SITIO MATIAS	2	2	1.1	999
QUEIMADINHA	2	2	1.44	999
SERRARIA BRASIL	2	0	3.98	999
ASA BRANCA	2	3	2.41	999
JARDIM CRUZEIRO	2	1	2.89	999
QUEIMADINHA	2	2	1.44	999
FEIRA X	1	3	1.4	999
HOMERO FIGUEREDO	2	2	2.85	999
IRMA DULCE	2	0	2.42	999
CSU - CIDADE NOVA	2	0	2.64	999
ASA BRANCA	2	3	2.41	999
IRMA DULCE	2	0	2.42	1
PAMPALONA	2	1	1.1	999
CASEB I	2	0	3.55	999
SOBRADINHO II - MORADA DAS ARVORES	2	1	1.44	999
SOBRADINHO II - MORADA DAS ARVORES	2	1	1.44	999
CSU - CIDADE NOVA	1	0	2.64	999
FRANCISCO PINTO	2	1	0.52	0
SUBAE	2	1	1.68	999
SUBAE	2	1	1.68	999
PANORAMA - SITIO MATIAS	2	2	1.1	999
CAMPO LIMPO	2	2	2.99	999
PARQUE IPE	2	1	1.05	999
PEDRA DO DESCANSO	2	1	1.57	3
CASSA - CAPUCHINHOS	2	0	1.73	999
SERRARIA BRASIL	2	0	3.98	999
GEORGE AMERICO	2	3	2.46	999
SANTA MONICA II	2	1	1.02	999
CSU - CIDADE NOVA	2	0	2.64	999
PANORAMA - SITIO MATIAS	2	2	1.1	999
CASSA - CAPUCHINHOS	2	0	1.73	999
FEIRA X	2	3	1.4	3
DISPENSARIO SANTANA - JARDIM ACÃCIA	2	1	1.39	999
GEORGE AMERICO	1	3	2.46	999
ASA BRANCA	2	3	2.41	999
DISPENSARIO SANTANA - JARDIM ACÃCIA	2	1	1.39	999
SERRARIA BRASIL	2	0	3.98	999
CAMPO LIMPO	2	2	2.99	999
CAMPO LIMPO	2	2	2.99	999
GEORGE AMERICO	2	3	2.46	999
PAMPALONA	2	1	1.1	999
QUEIMADINHA	2	2	1.44	999
HOMERO FIGUEREDO	2	2	2.85	999
CASEB I	2	0	3.55	999
DISPENSARIO SANTANA - JARDIM ACÃCIA	2	1	1.39	0
ASA BRANCA	2	3	2.41	999
CAMPO LIMPO	1	2	2.99	999
SOBRADINHO II - MORADA DAS ARVORES	2	1	1.44	999
JARDIM CRUZEIRO	2	1	2.89	999
MANGABEIRA	2	2	4.5	999
PEDRA DO DESCANSO	2	1	1.57	0
PANORAMA - SITIO MATIAS	2	2	1.1	0
PEDRA DO DESCANSO	2	1	1.57	0
PANORAMA - SITIO MATIAS	2	2	1.1	999
JARDIM CRUZEIRO	2	1	2.89	999
CASSA - CAPUCHINHOS	2	0	1.73	999
QUEIMADINHA	2	2	1.44	999
CONCEICAO IV - SANTO ANTONIO DOS PRAZERES	2	3	0.53	999
CASEB II	2	1	3.55	999
JARDIM CRUZEIRO	2	1	2.89	999
CAMPO LIMPO	2	2	2.99	999
SERRARIA BRASIL	2	0	3.98	999
JARDIM CRUZEIRO	2	1	2.89	0
SERRARIA BRASIL	2	0	3.98	0
CSU - CIDADE NOVA	2	0	2.64	999
PARQUE IPE	2	1	1.05	999
SANTA MONICA II	2	1	1.02	999
IRMA DULCE	2	0	2.42	999
JUSSARA - FEIRA X	2	3	1.4	999
SANTA MONICA II	2	1	1.02	999
SERRARIA BRASIL	1	0	3.98	999
SERRARIA BRASIL	1	0	3.98	999
SOBRADINHO II - MORADA DAS ARVORES	1	1	1.44	999
PANORAMA - SITIO MATIAS	2	2	1.1	999
IRMA DULCE	2	0	2.42	999
PARQUE IPE	2	1	1.05	999
MANGABEIRA	1	2	4.5	999
CONCEICAO IV - SANTO ANTONIO DOS PRAZERES	2	3	0.53	999
CASSA - CAPUCHINHOS	2	0	1.73	999
BARAUNAS	2	1	1.22	1
PEDRA DO DESCANSO	2	1	1.57	999
CAMPO LIMPO	2	2	2.99	3
QUEIMADINHA	2	2	1.44	999
FEIRA X	1	3	1.4	999
PARQUE IPE	2	1	1.05	999
PARQUE IPE	2	1	1.05	999
CONCEICAO III	2	2	0.78	999
PAMPALONA	2	1	1.1	999
DISPENSARIO SANTANA - JARDIM ACÃCIA	2	1	1.39	999
PANORAMA - SITIO MATIAS	2	2	1.1	999
JARDIM CRUZEIRO	2	1	2.89	1
CAMPO LIMPO	2	2	2.99	999
GEORGE AMERICO	2	3	2.46	999
IRMA DULCE	2	0	2.42	999
CONCEICAO III	2	2	0.78	999
FRANCISCO PINTO	2	1	0.52	999
RUA NOVA	2	2	1.38	1
QUEIMADINHA	1	2	1.44	999
CASEB I	2	0	3.55	0
TOMBA	2	2	2.19	999
FRANCISCO PINTO	2	1	0.52	1
PANORAMA - SITIO MATIAS	2	2	1.1	999
SOBRADINHO II - MORADA DAS ARVORES	2	1	1.44	0
CONCEICAO III	2	2	0.78	999
ASA BRANCA	2	3	2.41	999
SANTA MONICA II	2	1	1.02	999
PEDRA DO DESCANSO	2	1	1.57	999
IRMA DULCE	2	0	2.42	999
SERRARIA BRASIL	2	0	3.98	999
RUA NOVA	2	2	1.38	999
PEDRA DO DESCANSO	2	1	1.57	999
RUA NOVA	2	2	1.38	1
SANTA MONICA II	2	1	1.02	999
PEDRA DO DESCANSO	2	1	1.57	999
TOMBA	2	2	2.19	0
IRMA DULCE	2	0	2.42	0
PEDRA DO DESCANSO	2	1	1.57	999
SUBAE	2	1	1.68	999
SERRARIA BRASIL	2	0	3.98	999
CONCEICAO III	2	2	0.78	999
PAMPALONA	2	1	1.1	999
IRMA DULCE	2	0	2.42	999
CONCEICAO IV - SANTO ANTONIO DOS PRAZERES	2	3	0.53	999
IRMA DULCE	2	0	2.42	0
EUCALIPTOS	2	0	2.11	999
PANORAMA - SITIO MATIAS	2	2	1.1	999
FRANCISCO PINTO	2	1	0.52	999
CONCEICAO IV - SANTO ANTONIO DOS PRAZERES	2	3	0.53	999
CONCEICAO IV - SANTO ANTONIO DOS PRAZERES	2	3	0.53	999
CASEB I	2	0	3.55	999
CASEB II	2	1	3.55	999
PEDRA DO DESCANSO	2	1	1.57	0
SERRARIA BRASIL	2	0	3.98	999
PEDRA DO DESCANSO	2	1	1.57	999
FEIRA X	2	3	1.4	999
ASA BRANCA	2	3	2.41	999
CSU - CIDADE NOVA	2	0	2.64	999
PAMPALONA	2	1	1.1	999
SOBRADINHO II - MORADA DAS ARVORES	2	1	1.44	999
SOBRADINHO II - MORADA DAS ARVORES	2	1	1.44	999
JUSSARA - FEIRA X	1	3	1.4	999
GEORGE AMERICO	1	3	2.46	999
JUSSARA - FEIRA X	1	3	1.4	999
CSU - CIDADE NOVA	1	0	2.64	999
CONCEICAO IV - SANTO ANTONIO DOS PRAZERES	1	3	0.53	999
CASEB II	1	1	3.55	999
JARDIM CRUZEIRO	1	1	2.89	999
DISPENSARIO SANTANA - JARDIM ACÃCIA	1	1	1.39	999
BARAUNAS	1	1	1.22	999
DISPENSARIO SANTANA - JARDIM ACÃCIA	1	1	1.39	999
CONCEICAO IV - SANTO ANTONIO DOS PRAZERES	1	3	0.53	999
PAMPALONA	1	1	1.1	999
QUEIMADINHA	1	2	1.44	999
GEORGE AMERICO	1	3	2.46	999
PEDRA DO DESCANSO	1	1	1.57	999
CASEB I	2	0	3.55	999
TOMBA	1	2	2.19	999
IRMA DULCE	1	0	2.42	999
CSU - CIDADE NOVA	1	0	2.64	999
PAMPALONA	1	1	1.1	999
HOMERO FIGUEREDO	1	2	2.85	999
PANORAMA - SITIO MATIAS	1	2	1.1	999
CSU - CIDADE NOVA	1	0	2.64	999
FRANCISCO PINTO	1	1	0.52	999
FEIRA X	1	3	1.4	999
SERRARIA BRASIL	1	0	3.98	999
JARDIM CRUZEIRO	1	1	2.89	999
TOMBA	1	2	2.19	999
JARDIM CRUZEIRO	1	1	2.89	999
CONCEICAO III	1	2	0.78	999
IRMA DULCE	1	0	2.42	999
IRMA DULCE	1	0	2.42	999
IRMA DULCE	1	0	2.42	999
PANORAMA - SITIO MATIAS	1	2	1.1	999
PEDRA DO DESCANSO	1	1	1.57	999
SERRARIA BRASIL	1	0	3.98	999
SOBRADINHO II - MORADA DAS ARVORES	1	1	1.44	999
SOBRADINHO II - MORADA DAS ARVORES	1	1	1.44	999
CAMPO LIMPO	1	2	2.99	999
IRMA DULCE	1	0	2.42	999
PAMPALONA	1	1	1.1	999
FRANCISCO PINTO	1	1	0.52	999
IRMA DULCE	1	0	2.42	999
CAMPO LIMPO	1	2	2.99	999
PANORAMA - SITIO MATIAS	1	2	1.1	999
JARDIM CRUZEIRO	1	1	2.89	999
JARDIM CRUZEIRO	2	1	2.89	999
JARDIM CRUZEIRO	1	1	2.89	999
GEORGE AMERICO	1	3	2.46	999
GEORGE AMERICO	1	3	2.46	999
CAMPO LIMPO	1	2	2.99	999
CSU - CIDADE NOVA	1	0	2.64	999
CSU - CIDADE NOVA	1	0	2.64	999
TOMBA	1	2	2.19	999
PAMPALONA	1	1	1.1	999
CONCEICAO III	1	2	0.78	999
PAMPALONA	1	1	1.1	999
CAMPO LIMPO	1	2	2.99	999
SOBRADINHO II - MORADA DAS ARVORES	1	1	1.44	999
GEORGE AMERICO	1	3	2.46	999
FEIRA X	1	3	1.4	999
TOMBA	1	2	2.19	999
JARDIM CRUZEIRO	1	1	2.89	999
CASEB II	1	1	3.55	999
SOBRADINHO II - MORADA DAS ARVORES	1	1	1.44	999
CASEB I	1	0	3.55	999
CONCEICAO III	2	2	0.78	999
PEDRA DO DESCANSO	1	1	1.57	999
PEDRA DO DESCANSO	1	1	1.57	999
JARDIM CRUZEIRO	1	1	2.89	999
HOMERO FIGUEREDO	1	2	2.85	999
JARDIM CRUZEIRO	2	1	2.89	999
EUCALIPTOS	1	0	2.11	999
CASEB I	1	0	3.55	999
SUBAE	1	1	1.68	999
CASEB II	1	1	3.55	999
MANGABEIRA	1	2	4.5	999
HOMERO FIGUEREDO	1	2	2.85	999
DISPENSARIO SANTANA - JARDIM ACÃCIA	2	1	1.39	999
JARDIM CRUZEIRO	1	1	2.89	999
HOMERO FIGUEREDO	1	2	2.85	999
JARDIM CRUZEIRO	1	1	2.89	999
SUBAE	1	1	1.68	999
SUBAE	1	1	1.68	999
CONCEICAO III	1	2	0.78	999
TOMBA	1	2	2.19	999
JARDIM CRUZEIRO	1	1	2.89	999
CAMPO LIMPO	1	2	2.99	999
EUCALIPTOS	1	0	2.11	999
PEDRA DO DESCANSO	1	1	1.57	999
HOMERO FIGUEREDO	1	2	2.85	999
CASEB I	1	0	3.55	999
PEDRA DO DESCANSO	1	1	1.57	999
SOBRADINHO II - MORADA DAS ARVORES	1	1	1.44	999
QUEIMADINHA	2	2	1.44	999
QUEIMADINHA	1	2	1.44	999
SUBAE	1	1	1.68	999
SERRARIA BRASIL	2	0	3.98	999
PANORAMA - SITIO MATIAS	1	2	1.1	999
SOBRADINHO II - MORADA DAS ARVORES	1	1	1.44	999
PARQUE IPE	1	1	1.05	3
DISPENSARIO SANTANA - JARDIM ACÃCIA	1	1	1.39	999
CASEB II	2	1	3.55	999
EUCALIPTOS	2	0	2.11	0
SERRARIA BRASIL	2	0	3.98	0
PARQUE IPE	2	1	1.05	999
SUBAE	2	1	1.68	999
SOBRADINHO II - MORADA DAS ARVORES	2	1	1.44	999
PARQUE IPE	2	1	1.05	999
QUEIMADINHA	2	2	1.44	999
IRMA DULCE	2	0	2.42	999
PAMPALONA	1	1	1.1	999
SOBRADINHO II - MORADA DAS ARVORES	2	1	1.44	0
SANTA MONICA II	2	1	1.02	999
CASEB I	2	0	3.55	999
SOBRADINHO II - MORADA DAS ARVORES	2	1	1.44	999
JARDIM CRUZEIRO	2	1	2.89	999
JARDIM CRUZEIRO	2	1	2.89	999
PAMPALONA	2	1	1.1	999
SERRARIA BRASIL	2	0	3.98	999
ASA BRANCA	2	3	2.41	999
MANGABEIRA	2	2	4.5	999
CASSA - CAPUCHINHOS	2	0	1.73	999
SOBRADINHO II - MORADA DAS ARVORES	2	1	1.44	999
PAMPALONA	2	1	1.1	999
PANORAMA - SITIO MATIAS	2	2	1.1	999
TOMBA	2	2	2.19	999
BARAUNAS	2	1	1.22	999
CASSA - CAPUCHINHOS	2	0	1.73	999
CASSA - CAPUCHINHOS	2	0	1.73	999
SUBAE	2	1	1.68	999
PARQUE IPE	2	1	1.05	0
FRANCISCO PINTO	1	1	0.52	1
CASEB II	1	1	3.55	999
PANORAMA - SITIO MATIAS	1	2	1.1	999
EUCALIPTOS	1	0	2.11	1
CONCEICAO IV - SANTO ANTONIO DOS PRAZERES	1	3	0.53	999
JARDIM CRUZEIRO	1	1	2.89	1
CONCEICAO III	2	2	0.78	999
ASA BRANCA	2	3	2.41	999
HOMERO FIGUEREDO	2	2	2.85	0
PANORAMA - SITIO MATIAS	2	2	1.1	999
JARDIM CRUZEIRO	2	1	2.89	0
FEIRA X	2	3	1.4	999
ASA BRANCA	2	3	2.41	999
IRMA DULCE	2	0	2.42	999
CONCEICAO III	1	2	0.78	999
DISPENSARIO SANTANA - JARDIM ACÃCIA	1	1	1.39	999
PAMPALONA	1	1	1.1	999
CASEB I	1	0	3.55	999
JARDIM CRUZEIRO	1	1	2.89	999
SANTA MONICA II	1	1	1.02	999
CASSA - CAPUCHINHOS	1	0	1.73	999
CASEB I	1	0	3.55	999
CASSA - CAPUCHINHOS	1	0	1.73	999
PARQUE IPE	1	1	1.05	999
CONCEICAO III	1	2	0.78	999
QUEIMADINHA	1	2	1.44	999
GEORGE AMERICO	1	3	2.46	999
QUEIMADINHA	1	2	1.44	999
CONCEICAO III	1	2	0.78	999
PAMPALONA	1	1	1.1	999
BARAUNAS	1	1	1.22	999
SOBRADINHO II - MORADA DAS ARVORES	1	1	1.44	999
PARQUE IPE	1	1	1.05	999
PAMPALONA	1	1	1.1	999
JARDIM CRUZEIRO	1	1	2.89	0
SOBRADINHO II - MORADA DAS ARVORES	1	1	1.44	999
CASEB II	1	1	3.55	0
CASSA - CAPUCHINHOS	1	0	1.73	999
HOMERO FIGUEREDO	2	2	2.85	999
CASSA - CAPUCHINHOS	1	0	1.73	999
QUEIMADINHA	1	2	1.44	999
QUEIMADINHA	1	2	1.44	999
QUEIMADINHA	1	2	1.44	999
QUEIMADINHA	1	2	1.44	999
PAMPALONA	1	1	1.1	999
SUBAE	1	1	1.68	999
CASEB II	1	1	3.55	999
MANGABEIRA	1	2	4.5	999
RUA NOVA	1	2	1.38	999
SANTA MONICA II	1	1	1.02	999
PAMPALONA	1	1	1.1	1
EUCALIPTOS	1	0	2.11	999
SANTA MONICA II	1	1	1.02	999
SOBRADINHO II - MORADA DAS ARVORES	1	1	1.44	999
MANGABEIRA	1	2	4.5	999
QUEIMADINHA	1	2	1.44	999
ASA BRANCA	1	3	2.41	1
QUEIMADINHA	1	2	1.44	0
IRMA DULCE	1	0	2.42	999
MANGABEIRA	1	2	4.5	999
SOBRADINHO II - MORADA DAS ARVORES	1	1	1.44	999
ASA BRANCA	1	3	2.41	0
PARQUE IPE	1	1	1.05	999
TOMBA	1	2	2.19	0
CASSA - CAPUCHINHOS	1	0	1.73	999
SANTA MONICA II	1	1	1.02	0
PARQUE IPE	1	1	1.05	999
PANORAMA - SITIO MATIAS	1	2	1.1	3
EUCALIPTOS	1	0	2.11	999
TOMBA	1	2	2.19	999
PEDRA DO DESCANSO	1	1	1.57	999
PARQUE IPE	1	1	1.05	0
EUCALIPTOS	1	0	2.11	999
MANGABEIRA	1	2	4.5	999
SUBAE	1	1	1.68	999
PAMPALONA	1	1	1.1	999
TOMBA	1	2	2.19	0
TOMBA	1	2	2.19	0
JARDIM CRUZEIRO	1	1	2.89	999
HOMERO FIGUEREDO	1	2	2.85	999
PAMPALONA	1	1	1.1	999
TOMBA	1	2	2.19	0
ASA BRANCA	1	3	2.41	1
JARDIM CRUZEIRO	1	1	2.89	999
FEIRA X	1	3	1.4	0
SOBRADINHO II - MORADA DAS ARVORES	1	1	1.44	999
PARQUE IPE	1	1	1.05	0
PANORAMA - SITIO MATIAS	1	2	1.1	999
CSU - CIDADE NOVA	1	0	2.64	999
GEORGE AMERICO	1	3	2.46	999
CONCEICAO III	1	2	0.78	999
QUEIMADINHA	1	2	1.44	999
CASSA - CAPUCHINHOS	1	0	1.73	999
SANTA MONICA II	1	1	1.02	999
CSU - CIDADE NOVA	1	0	2.64	999
GEORGE AMERICO	1	3	2.46	999
QUEIMADINHA	1	2	1.44	999
CONCEICAO IV - SANTO ANTONIO DOS PRAZERES	1	3	0.53	999
PARQUE IPE	1	1	1.05	999
CASSA - CAPUCHINHOS	1	0	1.73	999
SUBAE	1	1	1.68	0
HOMERO FIGUEREDO	1	2	2.85	999
ASA BRANCA	2	3	2.41	999
SERRARIA BRASIL	1	0	3.98	999
FRANCISCO PINTO	1	1	0.52	0
CSU - CIDADE NOVA	1	0	2.64	999
QUEIMADINHA	1	2	1.44	999
ASA BRANCA	2	3	2.41	999
CASSA - CAPUCHINHOS	2	0	1.73	999
SERRARIA BRASIL	1	0	3.98	0
PAMPALONA	1	1	1.1	999
MANGABEIRA	1	2	4.5	999
QUEIMADINHA	1	2	1.44	999
DISPENSARIO SANTANA - JARDIM ACÃCIA	1	1	1.39	999
PANORAMA - SITIO MATIAS	1	2	1.1	999
CASSA - CAPUCHINHOS	1	0	1.73	999
PARQUE IPE	1	1	1.05	999
FRANCISCO PINTO	1	1	0.52	999
CASSA - CAPUCHINHOS	1	0	1.73	999
CASEB II	1	1	3.55	999
QUEIMADINHA	2	2	1.44	999
FRANCISCO PINTO	1	1	0.52	0
CASSA - CAPUCHINHOS	1	0	1.73	999
CASSA - CAPUCHINHOS	1	0	1.73	999
TOMBA	1	2	2.19	999
PAMPALONA	1	1	1.1	1
DISPENSARIO SANTANA - JARDIM ACÃCIA	1	1	1.39	999
PAMPALONA	1	1	1.1	999
CASEB I	1	0	3.55	999
PARQUE IPE	1	1	1.05	999
CSU - CIDADE NOVA	1	0	2.64	999
PARQUE IPE	1	1	1.05	0
PAMPALONA	1	1	1.1	999
SOBRADINHO II - MORADA DAS ARVORES	1	1	1.44	999
FRANCISCO PINTO	1	1	0.52	999
BARAUNAS	1	1	1.22	999
PANORAMA - SITIO MATIAS	1	2	1.1	999
RUA NOVA	1	2	1.38	999
TOMBA	1	2	2.19	999
IRMA DULCE	1	0	2.42	999
PARQUE IPE	1	1	1.05	999
FEIRA X	1	3	1.4	999
PARQUE IPE	1	1	1.05	999
PANORAMA - SITIO MATIAS	1	2	1.1	999
EUCALIPTOS	1	0	2.11	999
GEORGE AMERICO	1	3	2.46	999
GEORGE AMERICO	1	3	2.46	999
CSU - CIDADE NOVA	1	0	2.64	0
PANORAMA - SITIO MATIAS	1	2	1.1	999
SOBRADINHO II - MORADA DAS ARVORES	2	1	1.44	999
CAMPO LIMPO	1	2	2.99	999
BARAUNAS	2	1	1.22	999
CAMPO LIMPO	2	2	2.99	999
GEORGE AMERICO	2	3	2.46	999
MANGABEIRA	2	2	4.5	999
CSU - CIDADE NOVA	2	0	2.64	999
PEDRA DO DESCANSO	2	1	1.57	999
RUA NOVA	2	2	1.38	999
CONCEICAO III	1	2	0.78	0
JARDIM CRUZEIRO	2	1	2.89	1
PARQUE IPE	2	1	1.05	1
CONCEICAO III	2	2	0.78	999
BARAUNAS	1	1	1.22	999
EUCALIPTOS	2	0	2.11	999
PARQUE IPE	2	1	1.05	999
IRMA DULCE	2	0	2.42	999
JUSSARA - FEIRA X	2	3	1.4	999
MANGABEIRA	2	2	4.5	999
EUCALIPTOS	2	0	2.11	999
FEIRA X	2	3	1.4	999
PANORAMA - SITIO MATIAS	2	2	1.1	999
BARAUNAS	2	1	1.22	999
MANGABEIRA	2	2	4.5	0
CONCEICAO IV - SANTO ANTONIO DOS PRAZERES	2	3	0.53	999
SERRARIA BRASIL	2	0	3.98	999
CONCEICAO III	2	2	0.78	999
CSU - CIDADE NOVA	1	0	2.64	999
CAMPO LIMPO	1	2	2.99	999
IRMA DULCE	1	0	2.42	999
PARQUE IPE	1	1	1.05	999
MANGABEIRA	2	2	4.5	999
SERRARIA BRASIL	2	0	3.98	0
SANTA MONICA II	2	1	1.02	999
IRMA DULCE	2	0	2.42	0
QUEIMADINHA	2	2	1.44	999
CASSA - CAPUCHINHOS	2	0	1.73	999
RUA NOVA	2	2	1.38	999
PAMPALONA	2	1	1.1	999
SOBRADINHO II - MORADA DAS ARVORES	2	1	1.44	999
DISPENSARIO SANTANA - JARDIM ACÃCIA	2	1	1.39	0
SUBAE	1	1	1.68	999
SUBAE	1	1	1.68	999
CONCEICAO III	1	2	0.78	999
PARQUE IPE	1	1	1.05	999
QUEIMADINHA	1	2	1.44	999
PANORAMA - SITIO MATIAS	2	2	1.1	999
TOMBA	2	2	2.19	999
PARQUE IPE	1	1	1.05	999
PANORAMA - SITIO MATIAS	2	2	1.1	999
QUEIMADINHA	1	2	1.44	0
CASSA - CAPUCHINHOS	1	0	1.73	999
QUEIMADINHA	2	2	1.44	999
CASSA - CAPUCHINHOS	2	0	1.73	999
CSU - CIDADE NOVA	2	0	2.64	999
JARDIM CRUZEIRO	2	1	2.89	999
IRMA DULCE	2	0	2.42	999
IRMA DULCE	2	0	2.42	999
PARQUE IPE	2	1	1.05	999
PAMPALONA	2	1	1.1	999
PAMPALONA	2	1	1.1	999
SOBRADINHO II - MORADA DAS ARVORES	2	1	1.44	999
GEORGE AMERICO	2	3	2.46	999
RUA NOVA	2	2	1.38	999
CONCEICAO IV - SANTO ANTONIO DOS PRAZERES	2	3	0.53	999
PARQUE IPE	2	1	1.05	999
PANORAMA - SITIO MATIAS	2	2	1.1	999
CASEB I	1	0	3.55	999
CAMPO LIMPO	2	2	2.99	999
JARDIM CRUZEIRO	2	1	2.89	999
FEIRA X	2	3	1.4	999
CSU - CIDADE NOVA	2	0	2.64	999
PAMPALONA	1	1	1.1	999
SUBAE	1	1	1.68	999
GEORGE AMERICO	1	3	2.46	999
SERRARIA BRASIL	1	0	3.98	999
SOBRADINHO II - MORADA DAS ARVORES	1	1	1.44	999
QUEIMADINHA	1	2	1.44	999
CAMPO LIMPO	1	2	2.99	999
CASEB II	2	1	3.55	999
QUEIMADINHA	1	2	1.44	1
CONCEICAO IV - SANTO ANTONIO DOS PRAZERES	1	3	0.53	999
RUA NOVA	1	2	1.38	999
CAMPO LIMPO	1	2	2.99	999
QUEIMADINHA	2	2	1.44	999
PARQUE IPE	1	1	1.05	999
CAMPO LIMPO	1	2	2.99	999
CAMPO LIMPO	1	2	2.99	999
CASSA - CAPUCHINHOS	1	0	1.73	999
FRANCISCO PINTO	1	1	0.52	0
SERRARIA BRASIL	1	0	3.98	999
CSU - CIDADE NOVA	1	0	2.64	999
CSU - CIDADE NOVA	1	0	2.64	999
FEIRA X	1	3	1.4	999
SERRARIA BRASIL	1	0	3.98	999
HOMERO FIGUEREDO	1	2	2.85	999
SANTA MONICA II	1	1	1.02	999
FEIRA X	1	3	1.4	999
CSU - CIDADE NOVA	1	0	2.64	999
QUEIMADINHA	1	2	1.44	999
SUBAE	1	1	1.68	999
SANTA MONICA II	1	1	1.02	999
QUEIMADINHA	1	2	1.44	999
SANTA MONICA II	1	1	1.02	999
FRANCISCO PINTO	1	1	0.52	999
CSU - CIDADE NOVA	1	0	2.64	999
CASSA - CAPUCHINHOS	1	0	1.73	999
PARQUE IPE	1	1	1.05	999
GEORGE AMERICO	1	3	2.46	999
QUEIMADINHA	1	2	1.44	999
IRMA DULCE	1	0	2.42	999
CASEB II	1	1	3.55	999
SERRARIA BRASIL	1	0	3.98	999
PARQUE IPE	1	1	1.05	999
SOBRADINHO II - MORADA DAS ARVORES	1	1	1.44	999
QUEIMADINHA	1	2	1.44	999
SUBAE	1	1	1.68	999
SOBRADINHO II - MORADA DAS ARVORES	1	1	1.44	999
QUEIMADINHA	1	2	1.44	999
SANTA MONICA II	1	1	1.02	1
CASEB I	1	0	3.55	999
[truncated: 14,621 more rows]
